# Supplementary material for: DABCO-catalyzed consecutive one pot four-component protocol for the synthesis of a novel class of (Z)-5-(3-hydroxy-2-oxoindolin-3-yl)-2-iminothiazolidin-4-ones
Source: Royal Society of Chemistry journal article supplement (doi:10.1039/c5ra24127h), 2016-01-01

## Supporting Information file

### **DABCO-Catalyzed consecutive one pot four-component protocol for the synthesis of a novel class of (z)-5-(3-hydroxy-2-oxoindolin-3-yl)-2-iminothiazol- idin-4-ones**

Madhu Babu Bejjam, G. Santhosh Kumar, A. Swetha and H. M. Meshram\*

*Medicinal Chemistry and Pharmacology Division,  
Indian Institute of Chemical Technology, Hyderabad – 500 007, India.*

*Tel.: +91-40-27191640, Fax: +91-40-27193275, E-mail address- hmmeshram@yahoo.com*

#### **General procedure for the synthesis of (Z)-3-butyl-5-(3-hydroxy-2-oxoindolin-3-yl)-2-(phenylimino)thiazolidin-4-one (5a):**

A mixture of butylamine **2a** (1 mmol), phenylisothiocyanate **3** (1 mmol) and DABCO (30 mol %) in H<sub>2</sub>O (5 mL) was stirred for 5 min at room temperature then the ethylbromoacetate **4** (1 mmol) was added and the mixture was stirred at 70 °C for 10 min. After cooling to room temperature, isatin **1** (1 mmol) was added to the reaction mixture and stirred for 10 min at room temperature. After completion of the reaction (monitored by TLC), the product **5a** was extracted with ethylacetate and dried over Na<sub>2</sub>SO<sub>4</sub> and the solvent was removed under reduced pressure. The crude product was purified by column chromatography using ethyl acetate/hexane and the product (Z)-3-butyl-5-(3-hydroxy-2-oxoindolin-3-yl)-2-(phenylimino)thiazolidin-4-one **5a** was characterized by NMR, Mass and IR spectroscopic techniques.

## Characterization Data

### (Z)-3-butyl-2-(phenylimino)thiazolidin-4-one

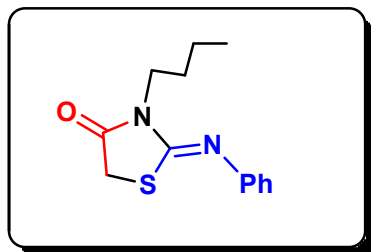

Yellow thick liquid;  $^1\text{H}$  NMR (300 MHz,  $\text{CDCl}_3$ ):  $\delta$  7.37-7.31 (m, 2H), 7.16-7.10 (m, 1H), 6.98-6.93 (m, 2H), 3.85 (t,  $J = 7.45$  Hz, 2H), 3.78 (s, 2H), 1.76-1.66 (m, 2H), 1.45-1.34 (m, 2H), 0.96 (t,  $J = 7.33$  Hz, 3H) ppm;  $^{13}\text{C}$  NMR (75 MHz,  $\text{CDCl}_3$ ):  $\delta$  171.1, 153.8, 147.6, 128.6, 123.9, 120.5, 42.3, 32.1, 28.7, 19.5, 13.3 ppm; IR(KBr):  $\nu = 2957, 2868, 1724, 1635, 1592, 1384, 1346, 1184, 1124, 770, 696$   $\text{cm}^{-1}$ ; MS-ESI:  $m/z = 249$   $[\text{M}+1]^+$ ; HRMS (ESI) calc.  $\text{C}_{13}\text{H}_{17}\text{ON}_2\text{S}$ : 249.10561, found: 249.10421.

### (Z)-3-benzyl-2-(phenylimino)thiazolidin-4-one

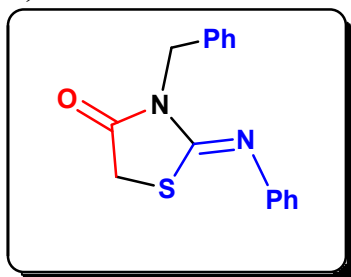

Yellow solid; Mp 111-113  $^{\circ}\text{C}$ ;  $^1\text{H}$  NMR (300 MHz,  $\text{CDCl}_3$ ):  $\delta$  7.54-7.50 (m, 2H), 7.37-7.26 (m, 5H), 7.16-7.10 (m, 1H), 6.97-6.92 (m, 2H), 5.02 (s, 2H), 3.79 (s, 2H) ppm;  $^{13}\text{C}$  NMR (75 MHz,  $\text{CDCl}_3$ ):  $\delta$  171.3, 153.8, 147.7, 135.8, 129.0, 128.8, 128.2, 127.7, 124.4, 120.8, 46.0, 32.4 ppm; IR(KBr):  $\nu = 3059, 2945, 1716, 1641, 1588, 1425, 1381, 1319, 1152, 1071, 693$   $\text{cm}^{-1}$ ; MS-ESI:  $m/z = 283$   $[\text{M}+1]^+$ ; HRMS (ESI) calc.  $\text{C}_{16}\text{H}_{15}\text{ON}_2\text{S}$ : 283.08996, found: 283.08914.

# $^1\text{H}$ NMR and $^{13}\text{C}$ NMR spectra of isolated intermediates

## $^1\text{H}$ NMR (300 MHz, $\text{CDCl}_3$ )

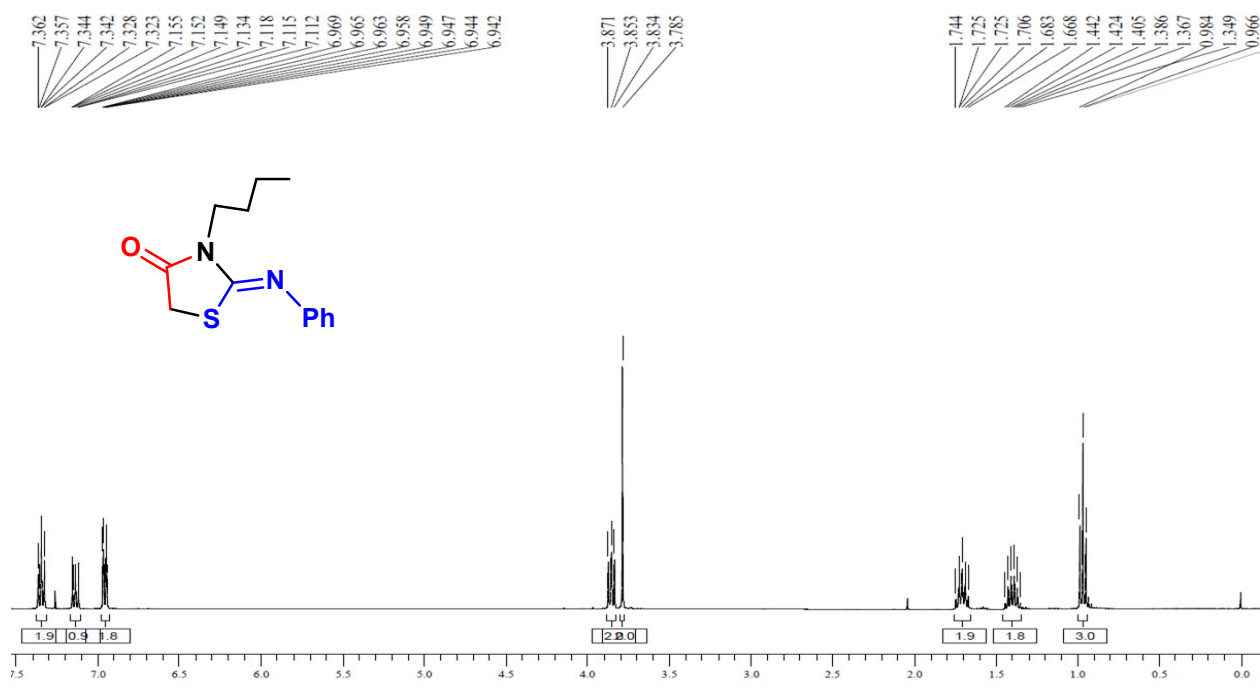

## $^{13}\text{C}$ NMR (75 MHz, $\text{CDCl}_3$ )

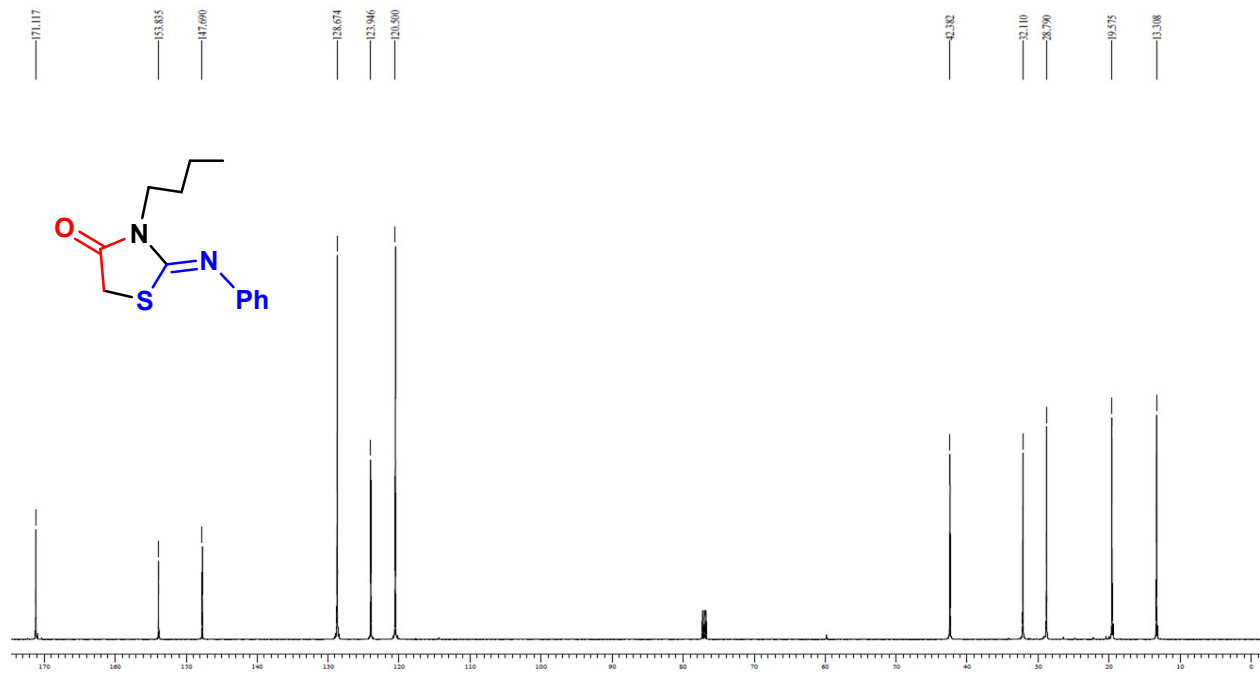

**<sup>1</sup>H NMR (300 MHz, CDCl<sub>3</sub>)**

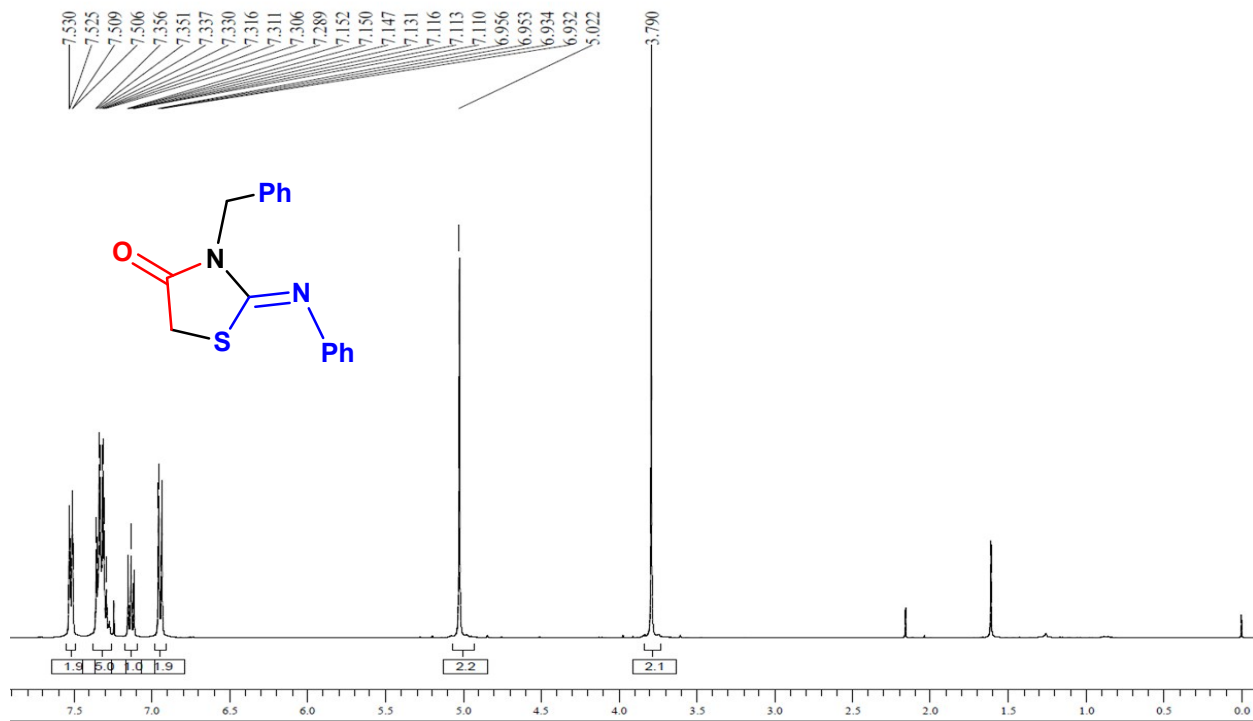

**<sup>13</sup>C NMR (75 MHz, CDCl<sub>3</sub>)**

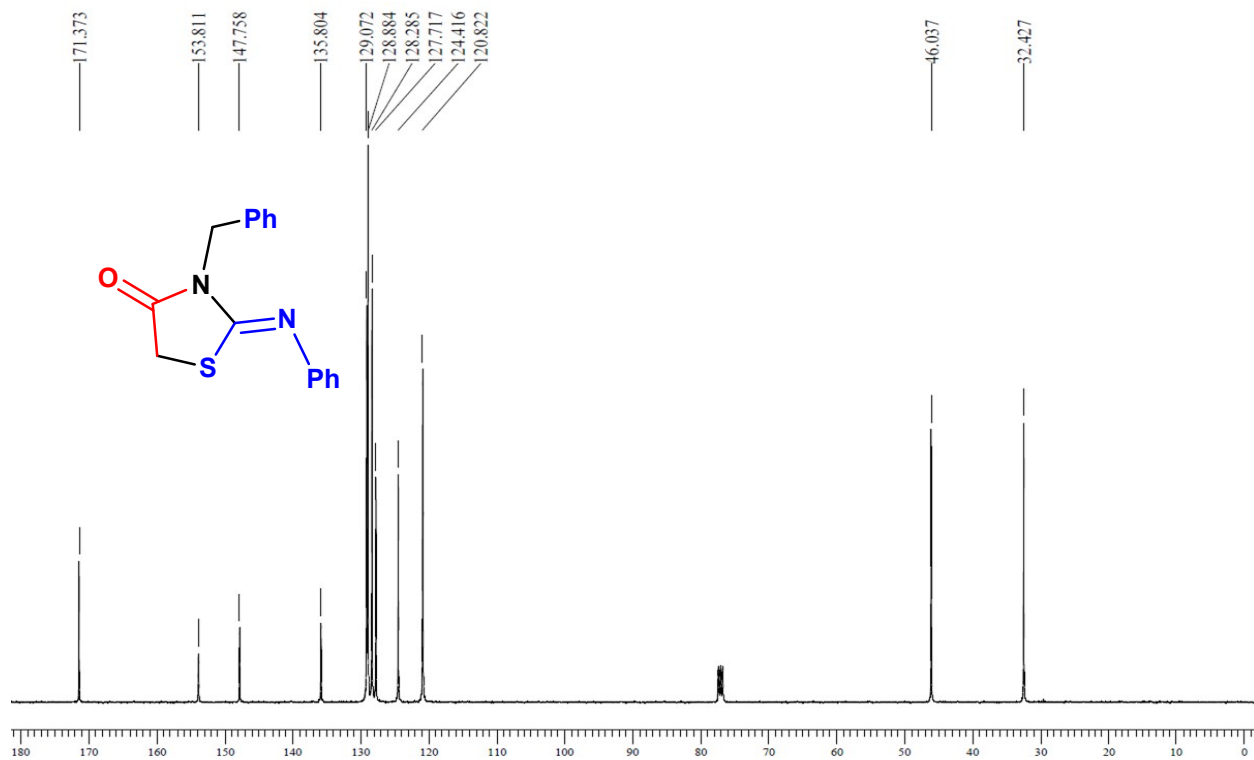

# <sup>1</sup>H NMR and <sup>13</sup>C NMR spectra

## Compound 5a

### <sup>1</sup>H NMR (300 MHz, CDCl<sub>3</sub>)

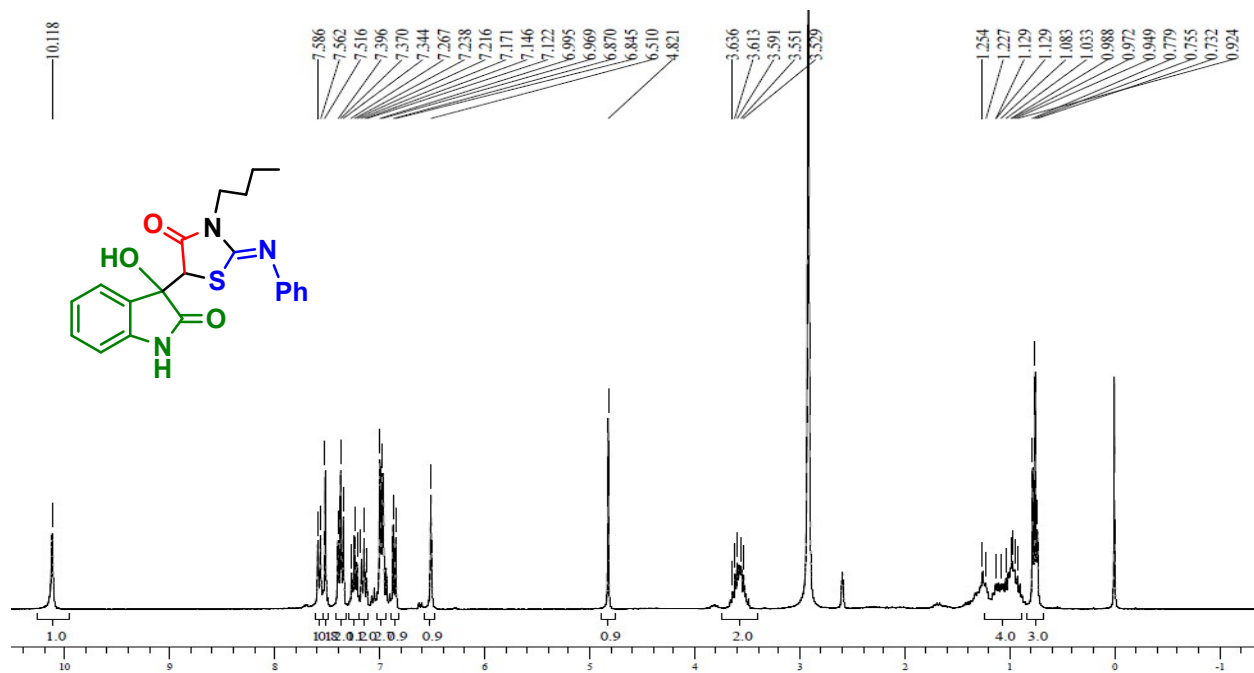

### <sup>13</sup>C NMR (75 MHz, CDCl<sub>3</sub>)

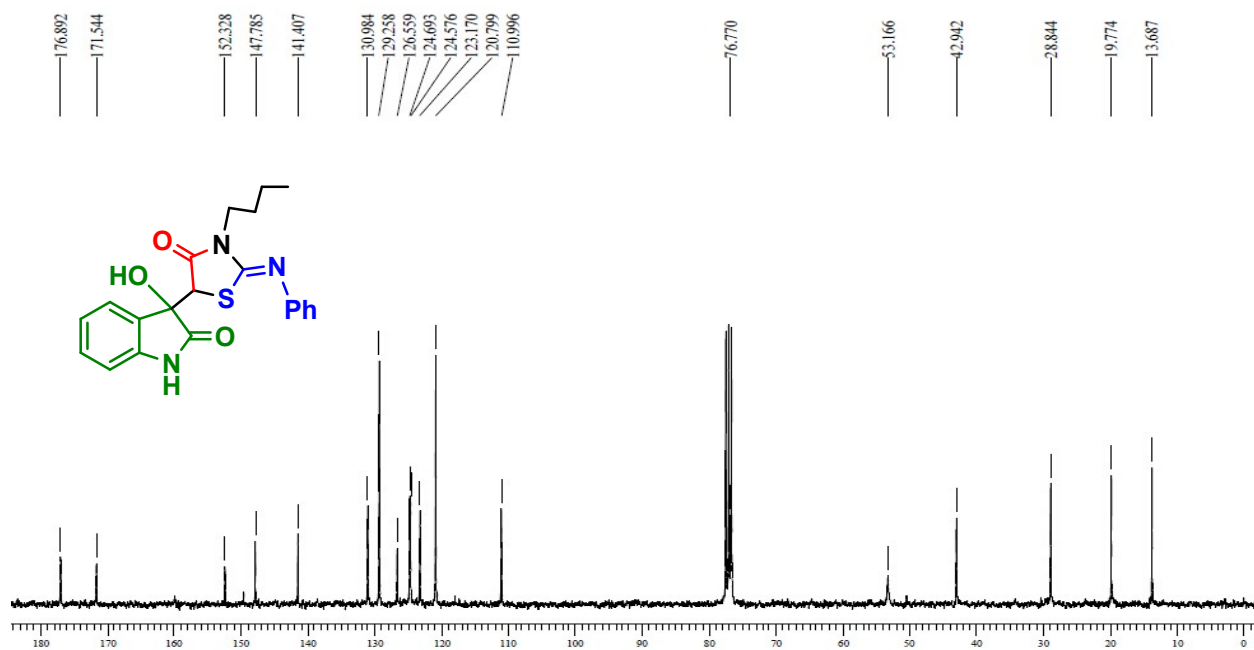

## Compound 5b

### $^1\text{H}$ NMR (300 MHz, $\text{CDCl}_3$ )

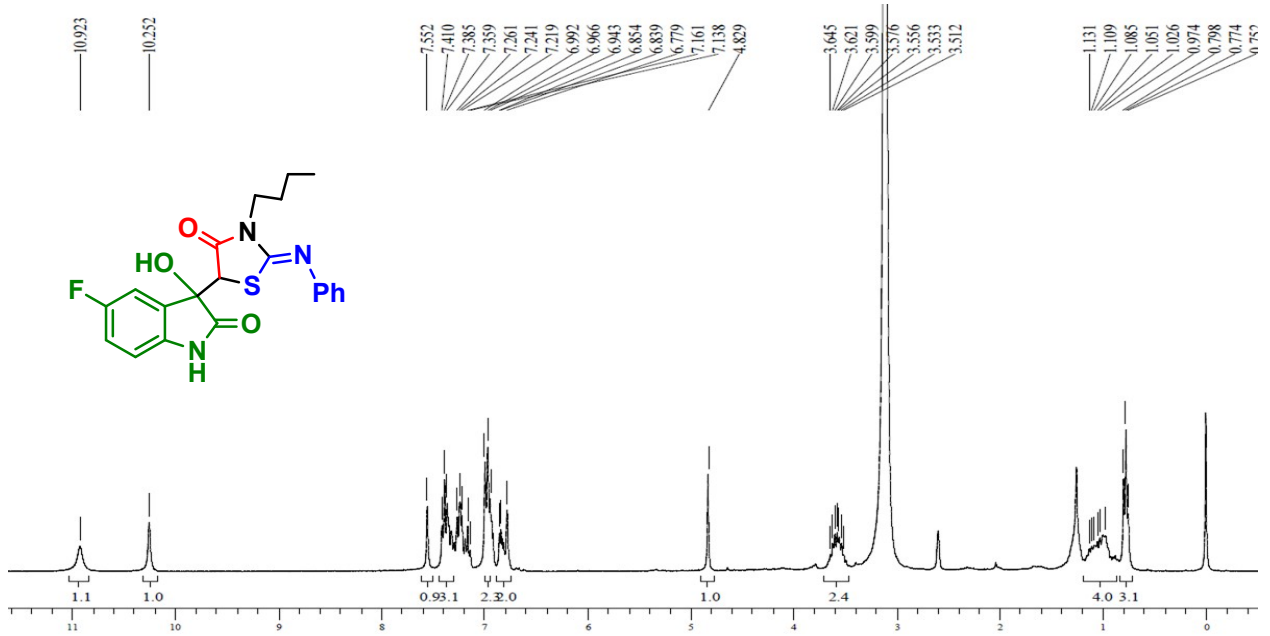

### $^{13}\text{C}$ NMR (75 MHz, $\text{CDCl}_3$ )

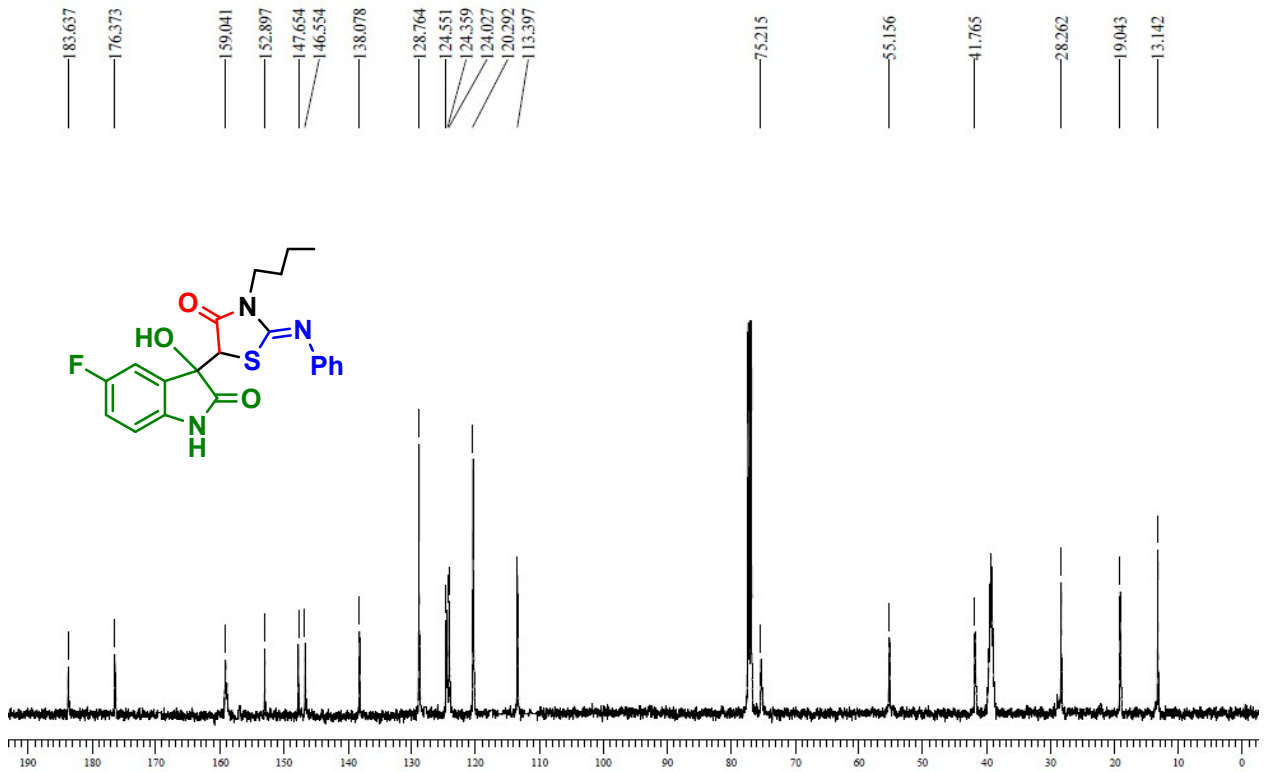

## Compound 5c

### $^1\text{H}$ NMR (300 MHz, $\text{CDCl}_3$ )

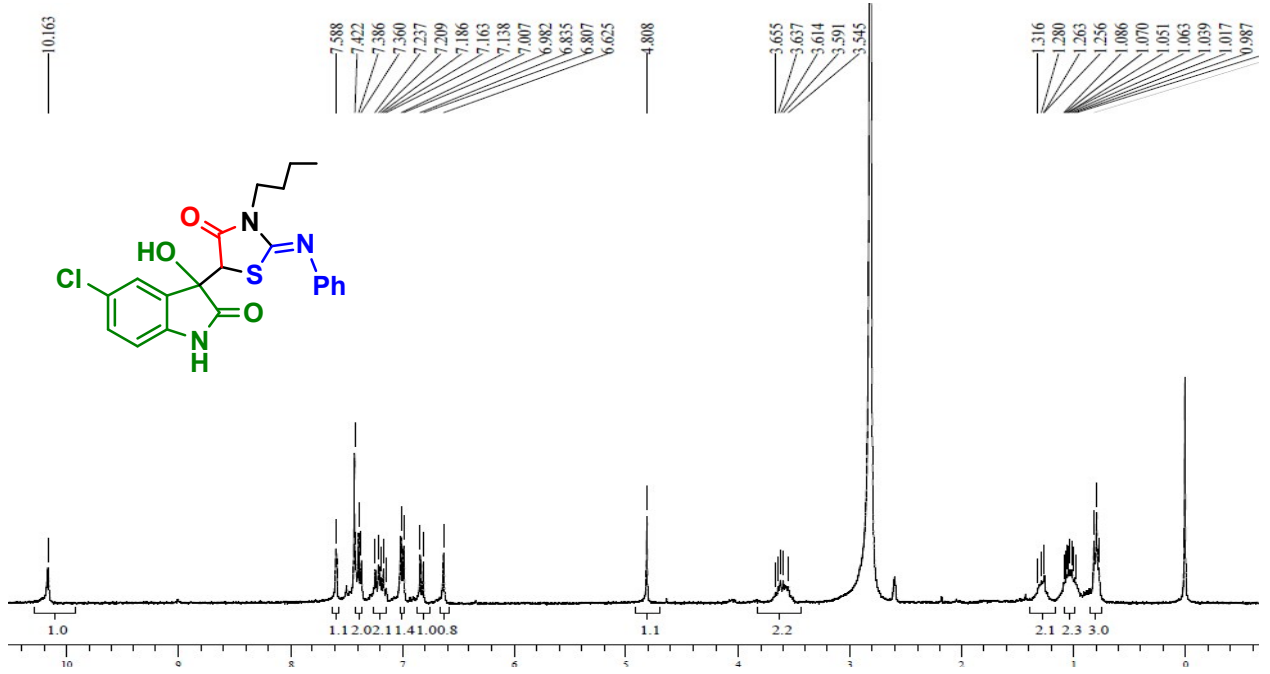

### $^{13}\text{C}$ NMR (75 MHz, $\text{CDCl}_3$ )

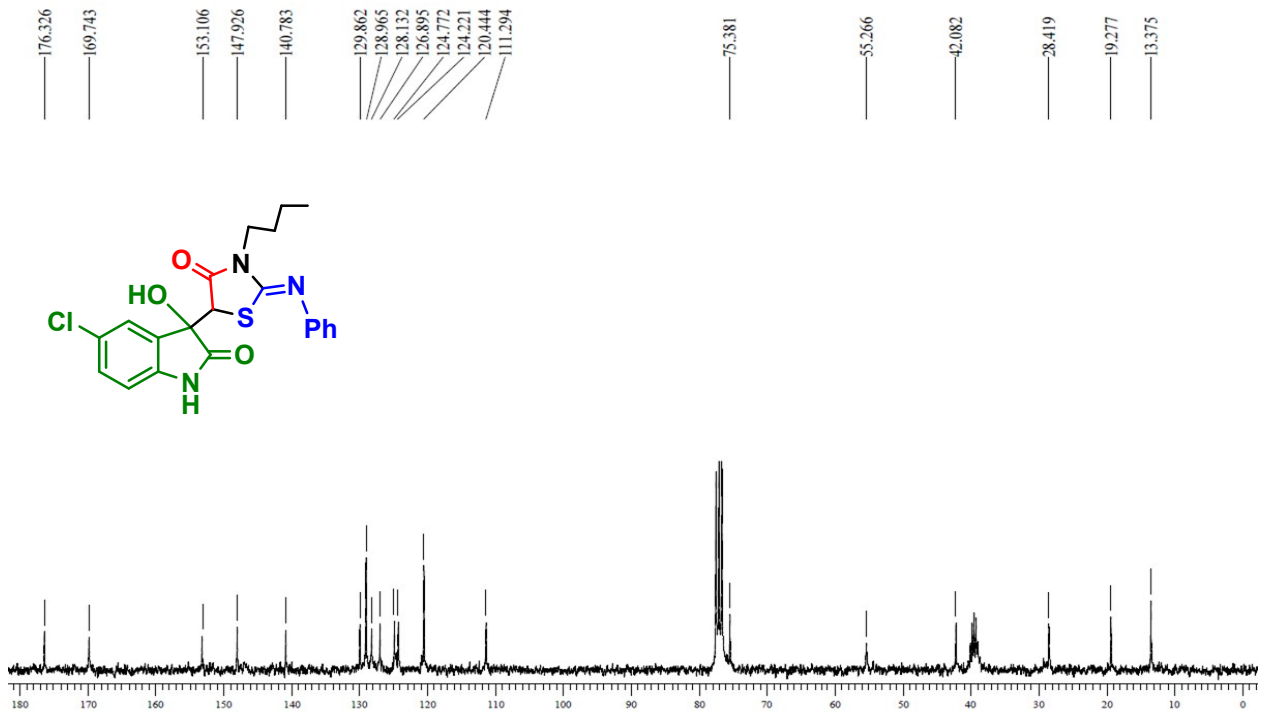

## Compound 5d

### <sup>1</sup>H NMR (300 MHz, CDCl<sub>3</sub>)

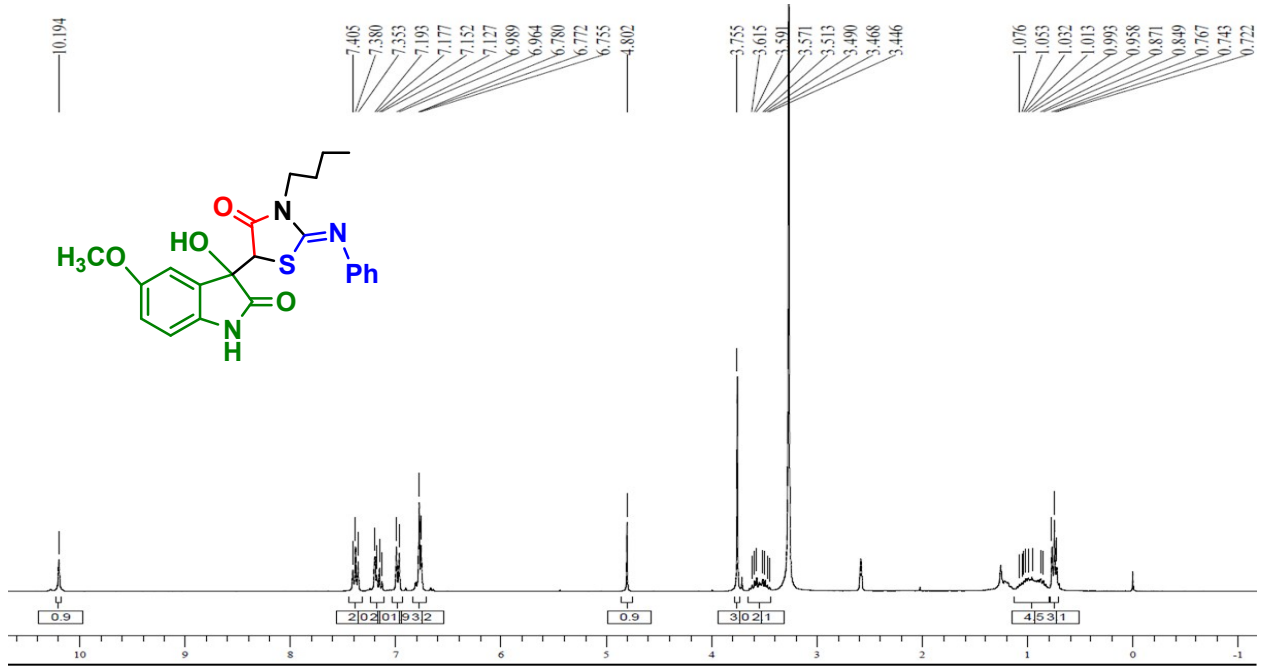

### <sup>13</sup>C NMR (75 MHz, CDCl<sub>3</sub>)

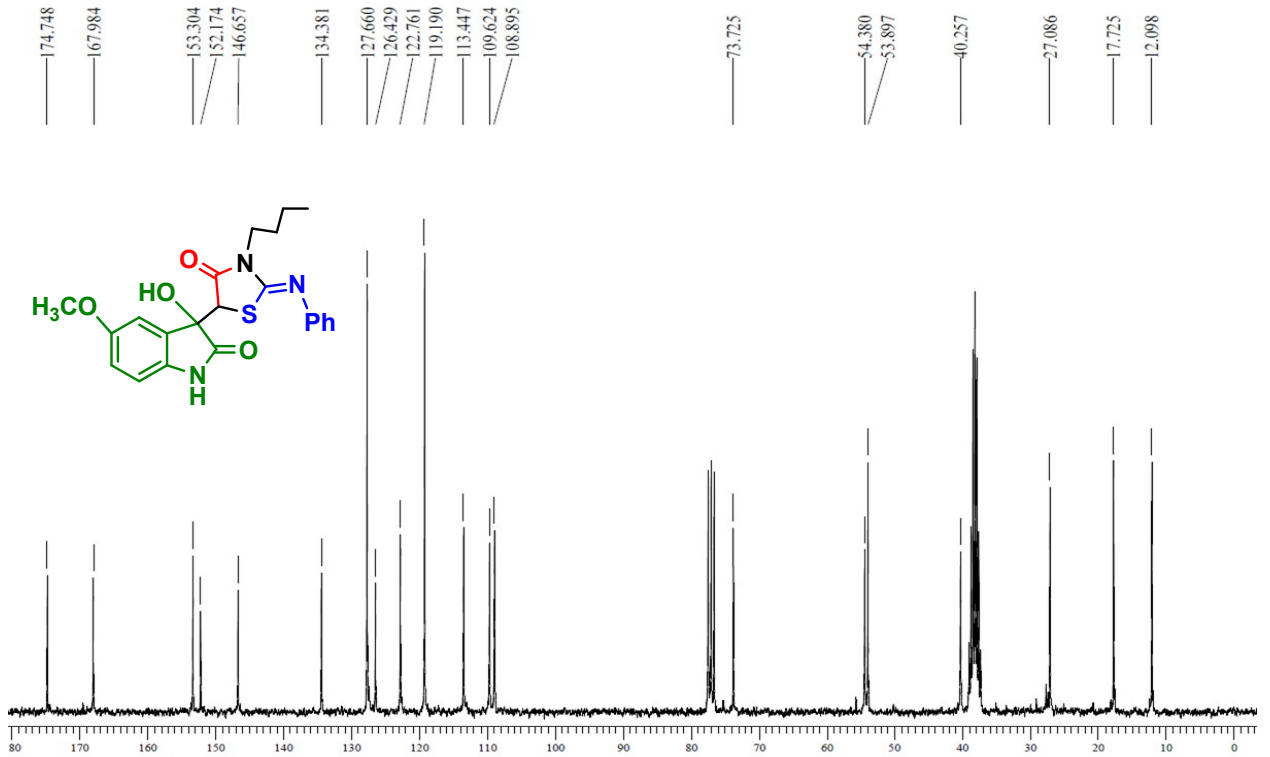



## Compound 5e

### <sup>1</sup>H NMR (300 MHz, CDCl<sub>3</sub>)

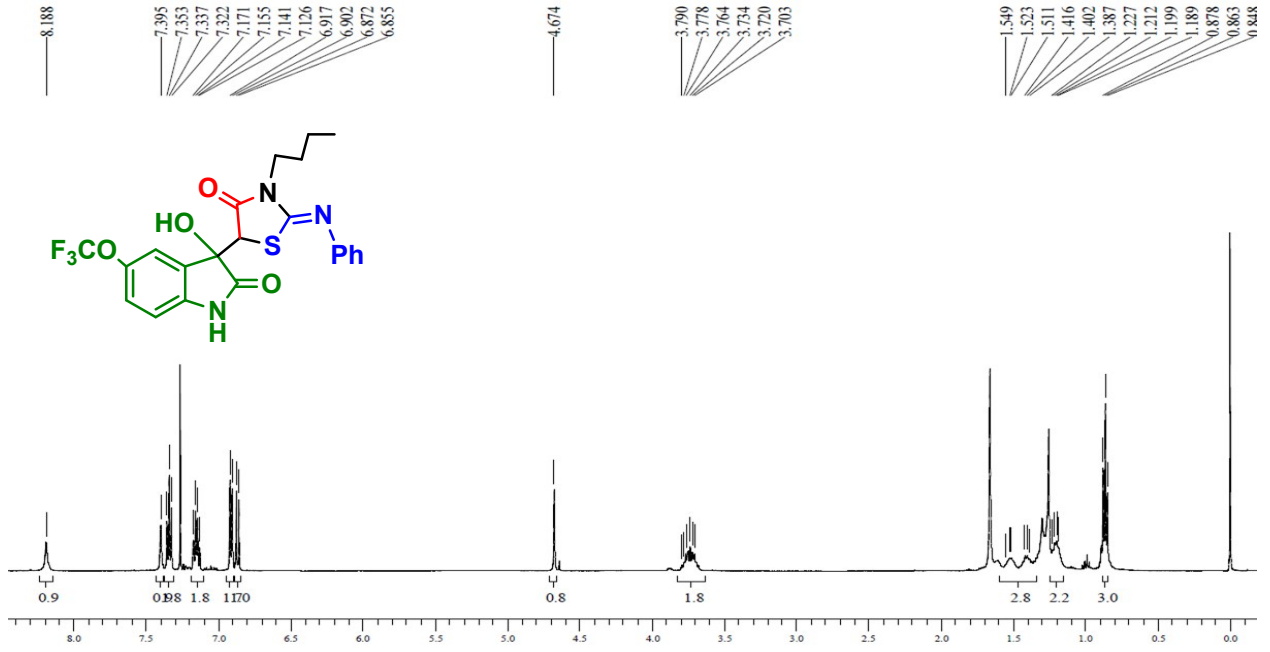

### <sup>13</sup>C NMR (75 MHz, CDCl<sub>3</sub>)

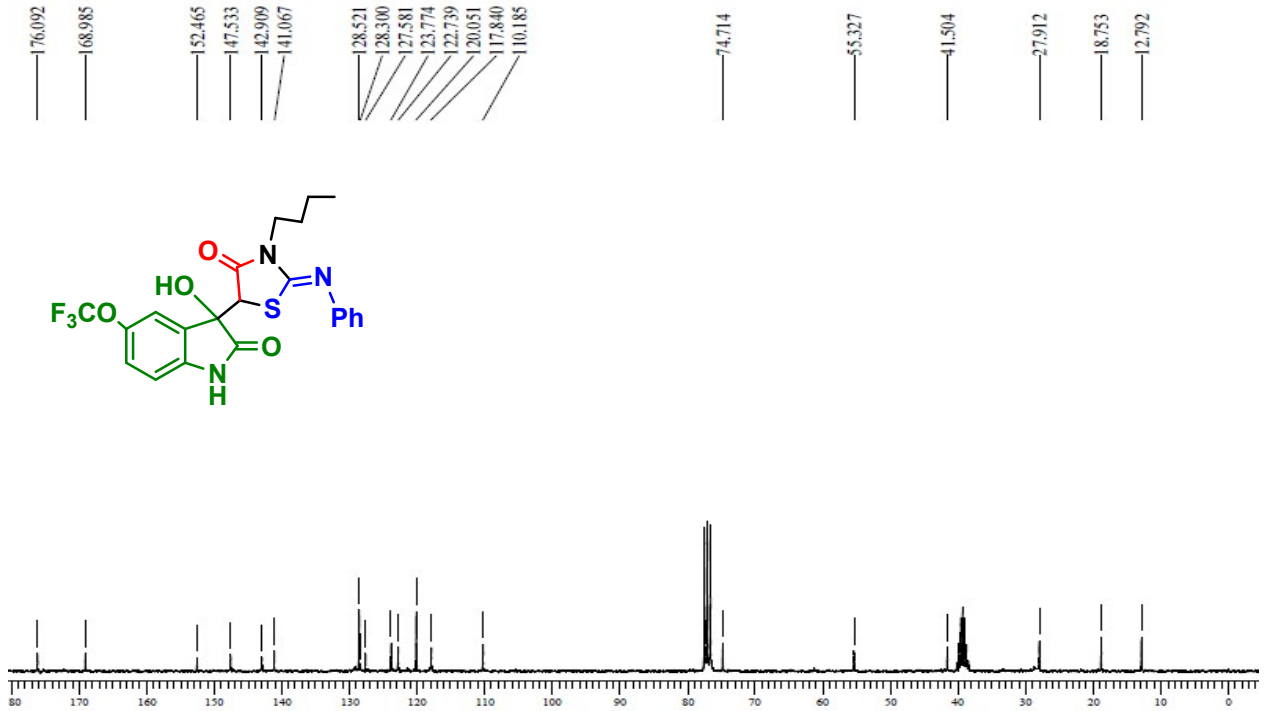

## Compound 5f

### <sup>1</sup>H NMR (300 MHz, CDCl<sub>3</sub>)

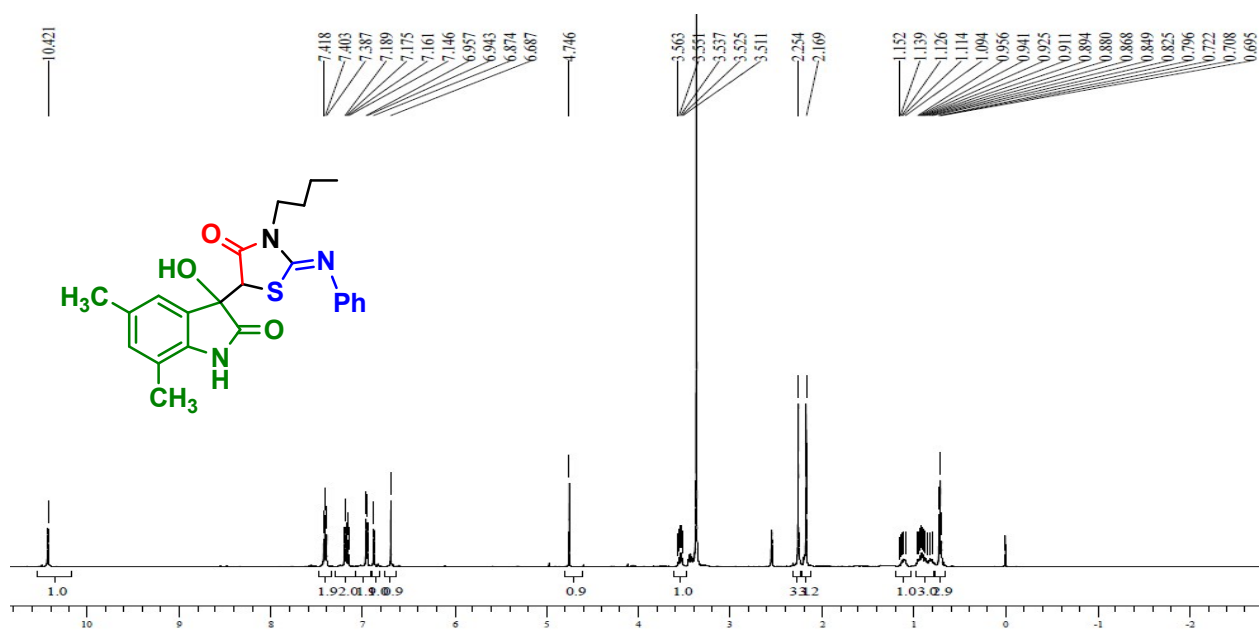

### <sup>13</sup>C NMR (75 MHz, CDCl<sub>3</sub>)

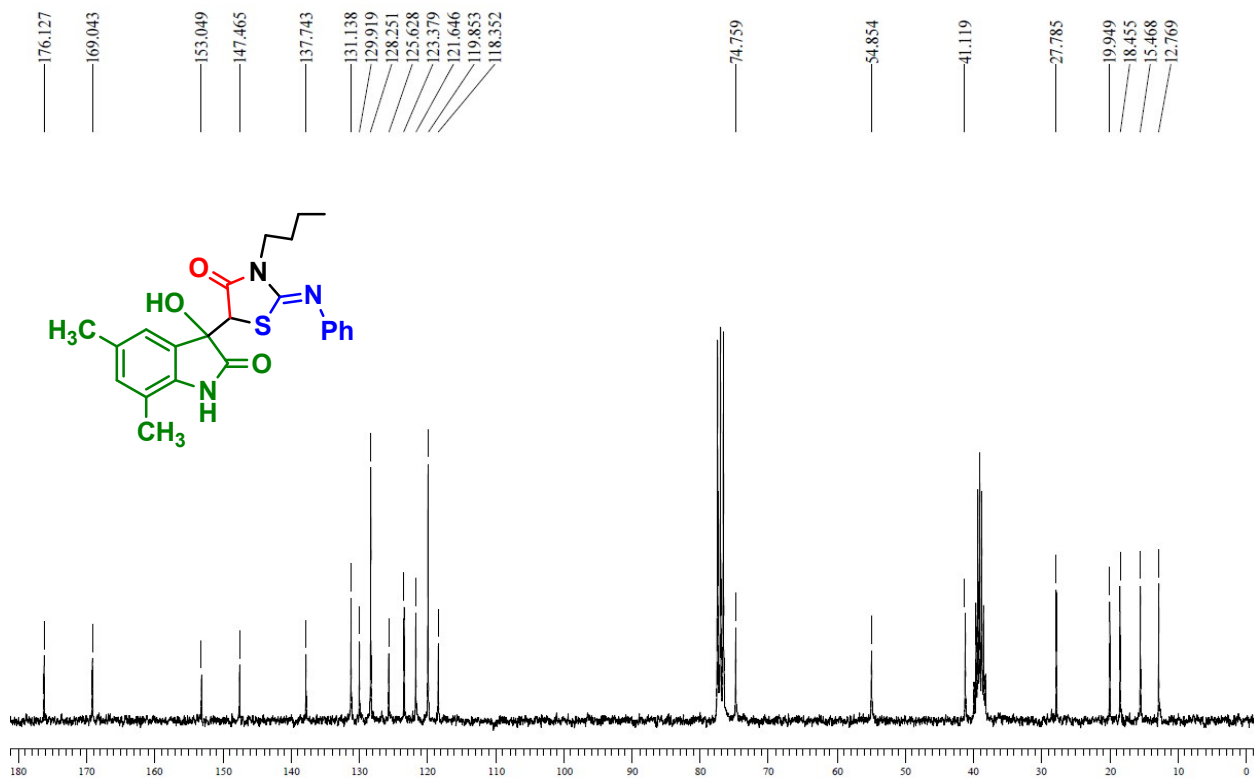

**Compound 5g**

**$^{13}\text{C}$  NMR (75 MHz,  $\text{CDCl}_3$ )**

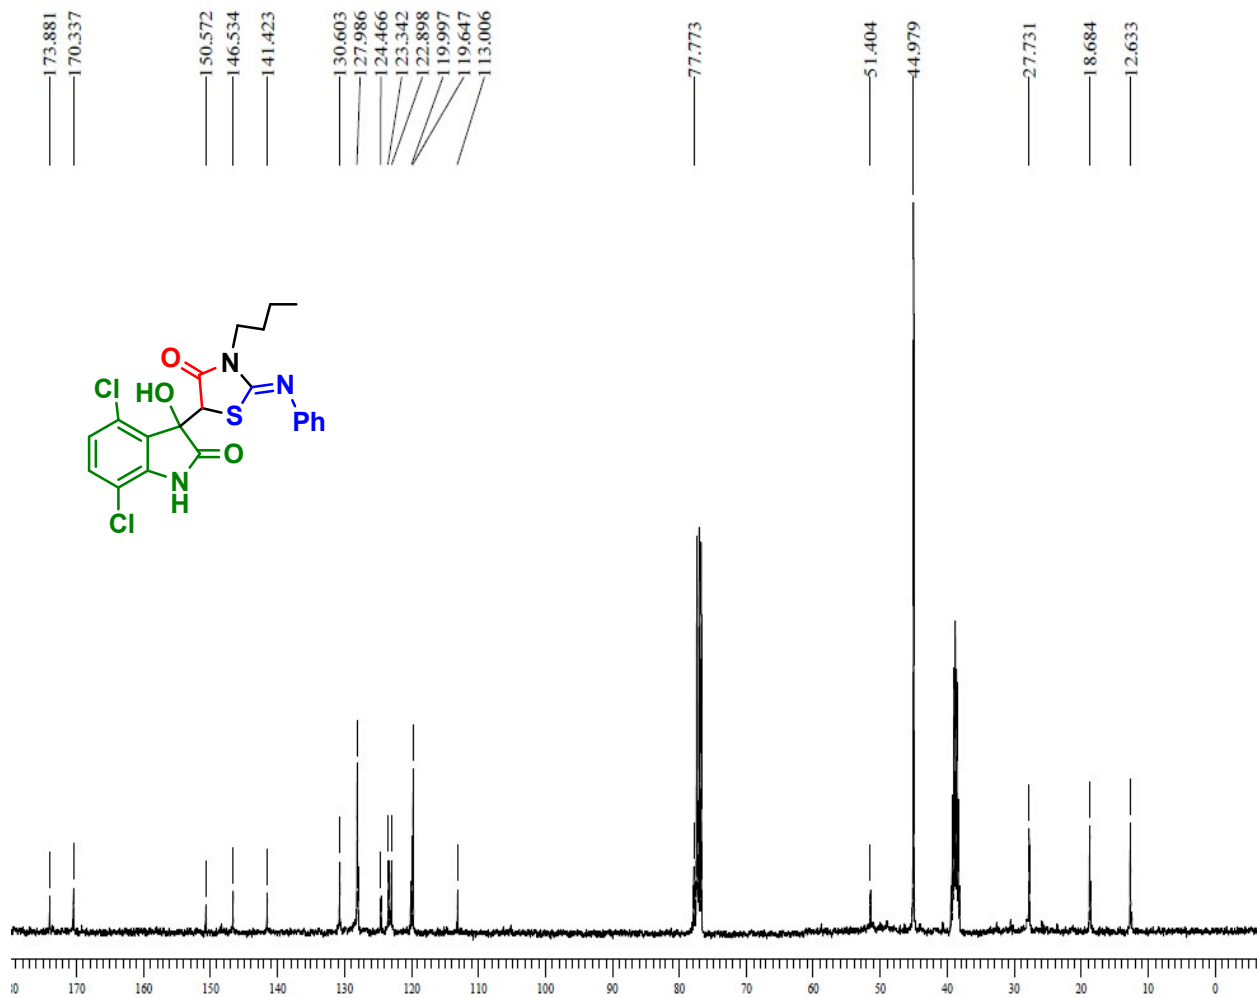

**Compound 5h**

### <sup>1</sup>H NMR (300 MHz, CDCl<sub>3</sub>)

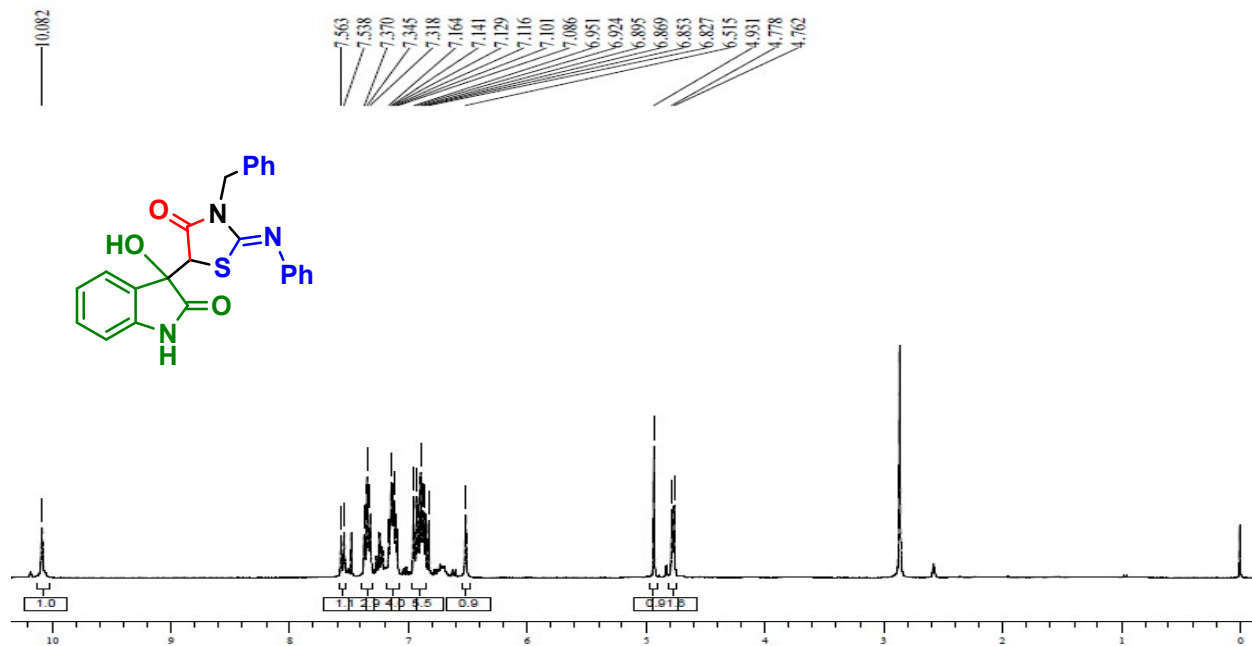

### <sup>13</sup>C NMR (75 MHz, CDCl<sub>3</sub>)

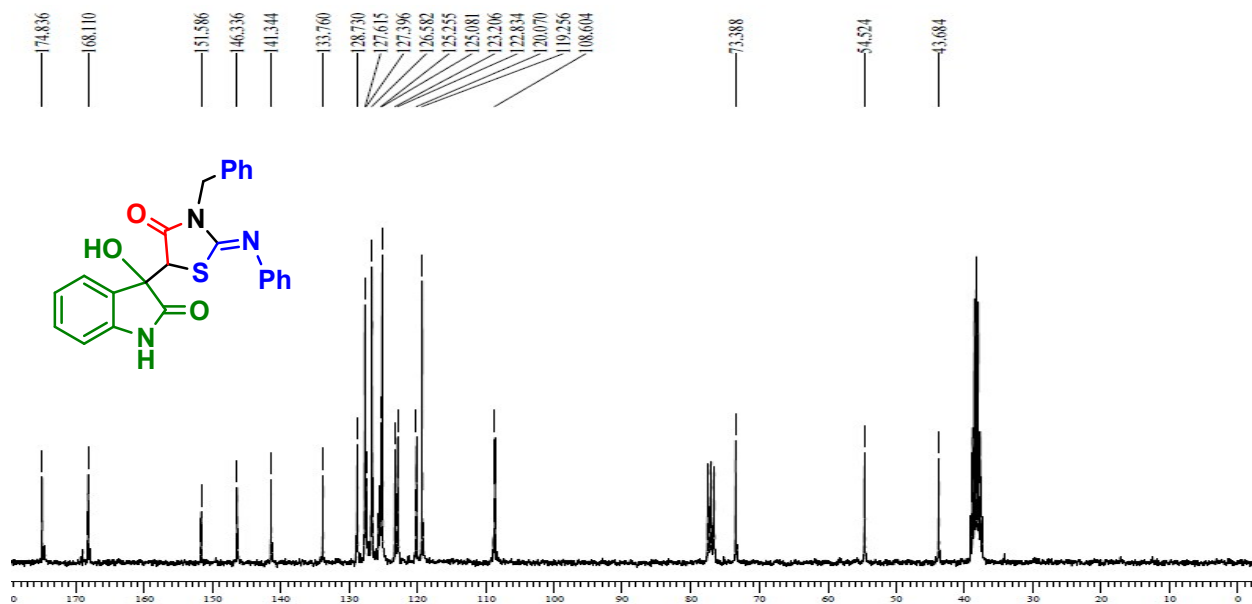

**Compound 5i**

### <sup>1</sup>H NMR (300 MHz, CDCl<sub>3</sub>)

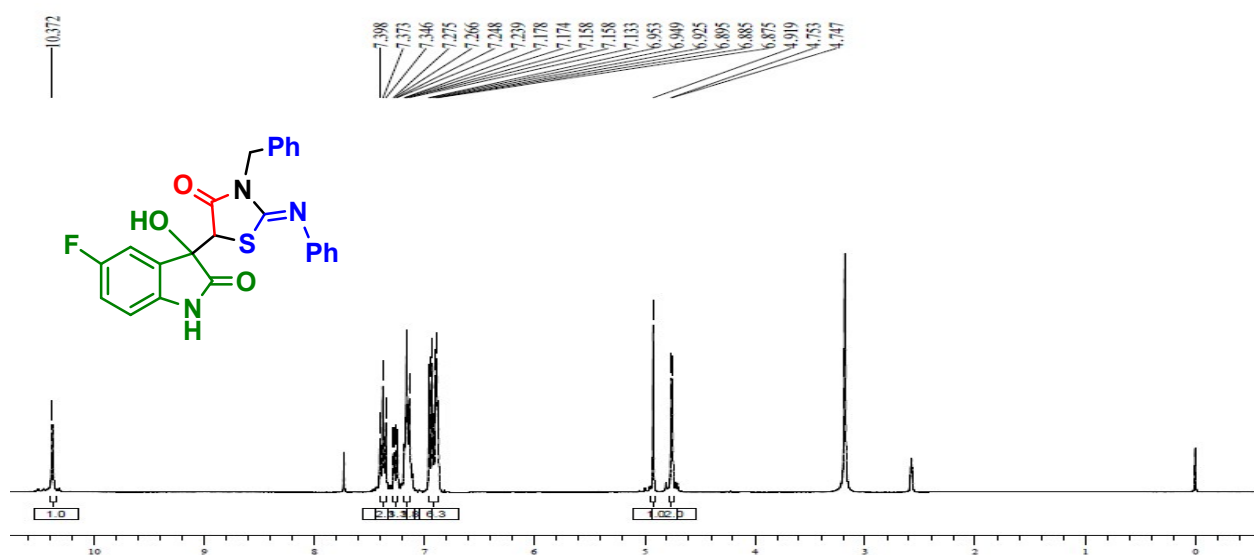

### <sup>13</sup>C NMR (75 MHz, CDCl<sub>3</sub>)

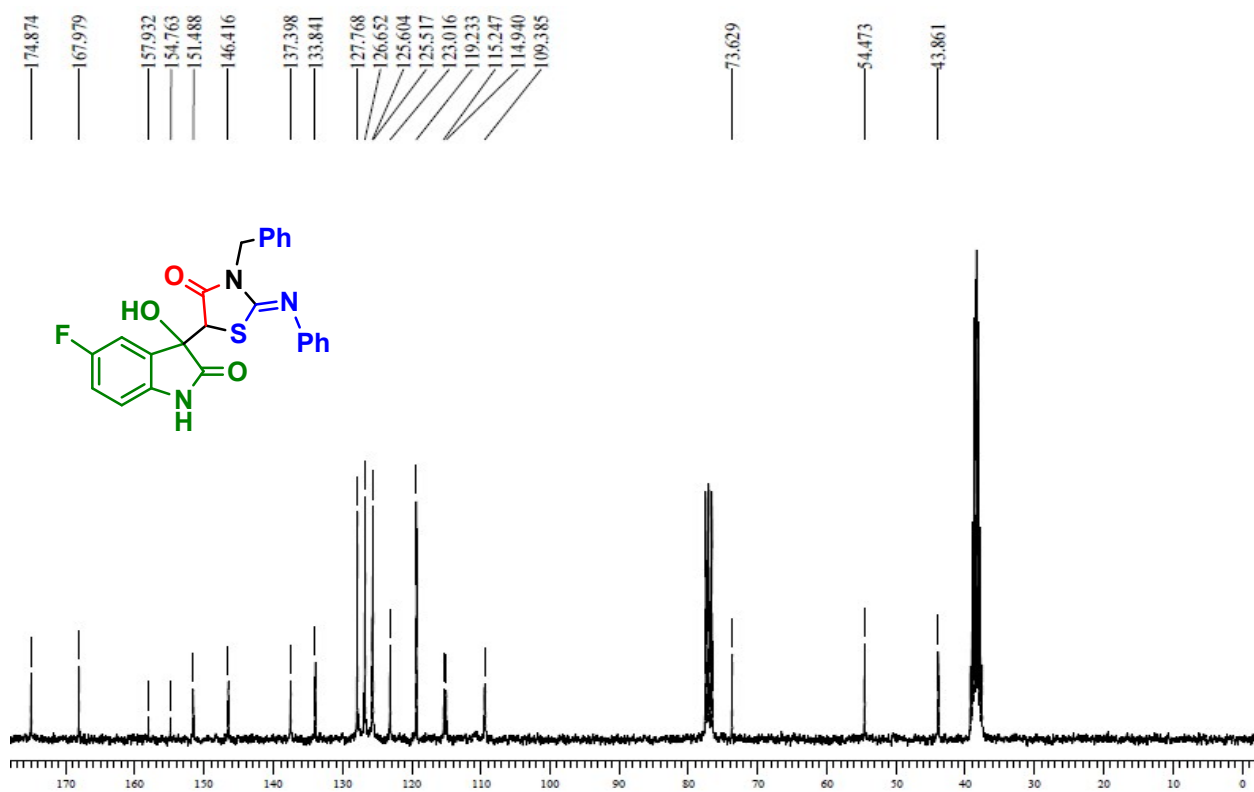

**Compound 5j**

**<sup>1</sup>H NMR (300 MHz, CDCl<sub>3</sub>)**

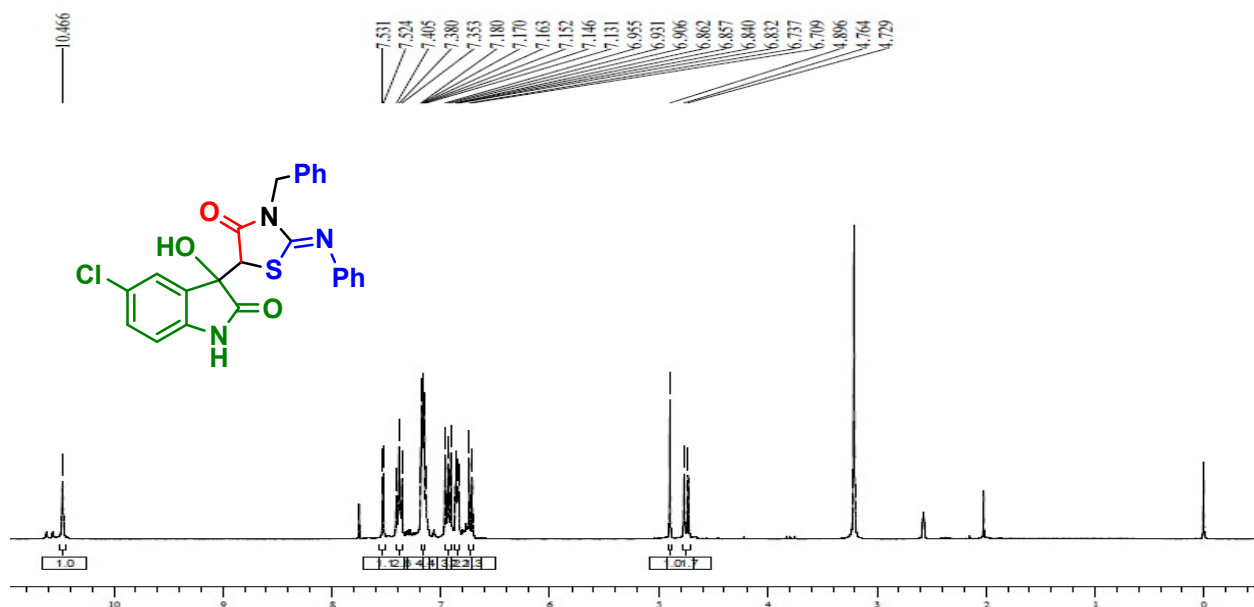

**<sup>13</sup>C NMR (75 MHz, CDCl<sub>3</sub>)**

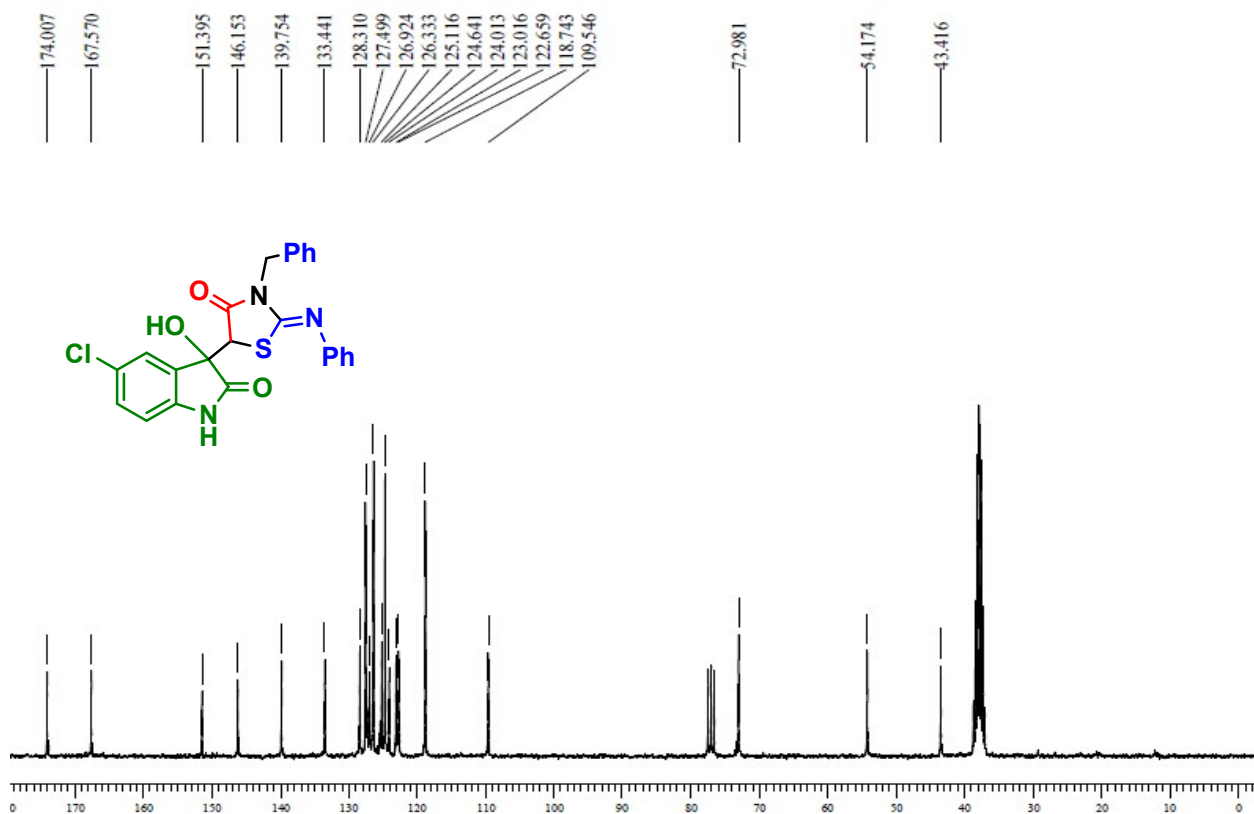

**Compound 5k**

### $^1\text{H}$ NMR (300 MHz, $\text{CDCl}_3$ )

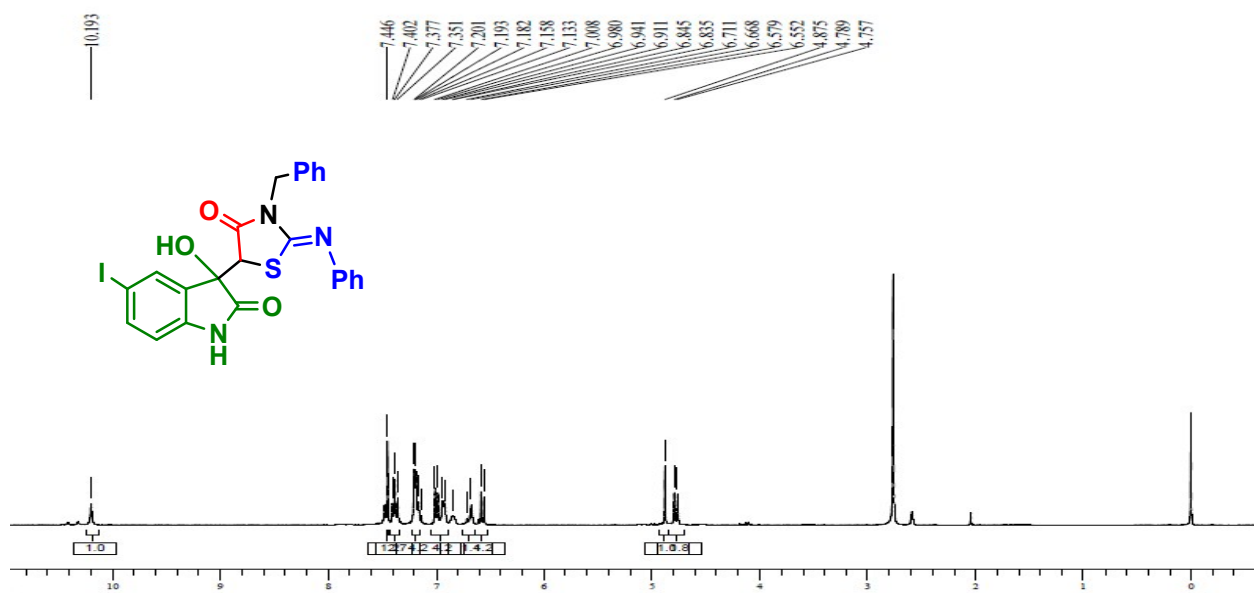

### $^{13}\text{C}$ NMR (75 MHz, $\text{CDCl}_3$ )

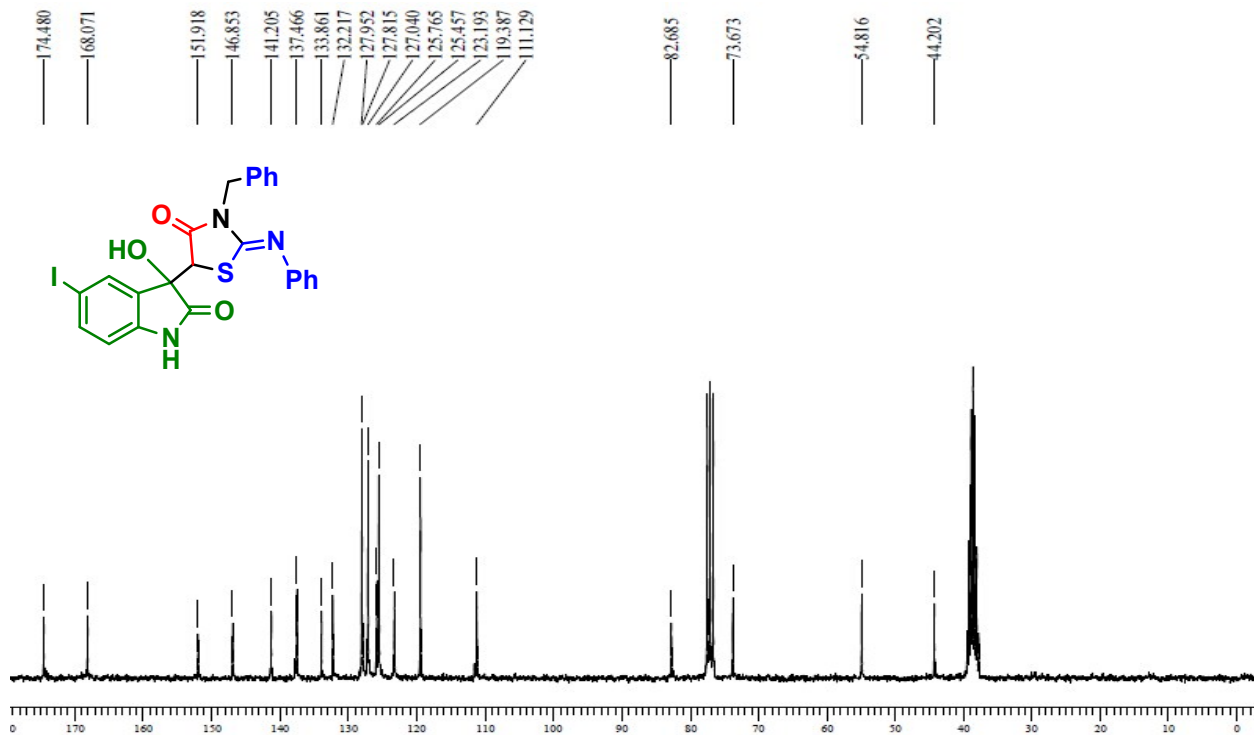

Compound 5l

**<sup>1</sup>H NMR (300 MHz, CDCl<sub>3</sub>)**

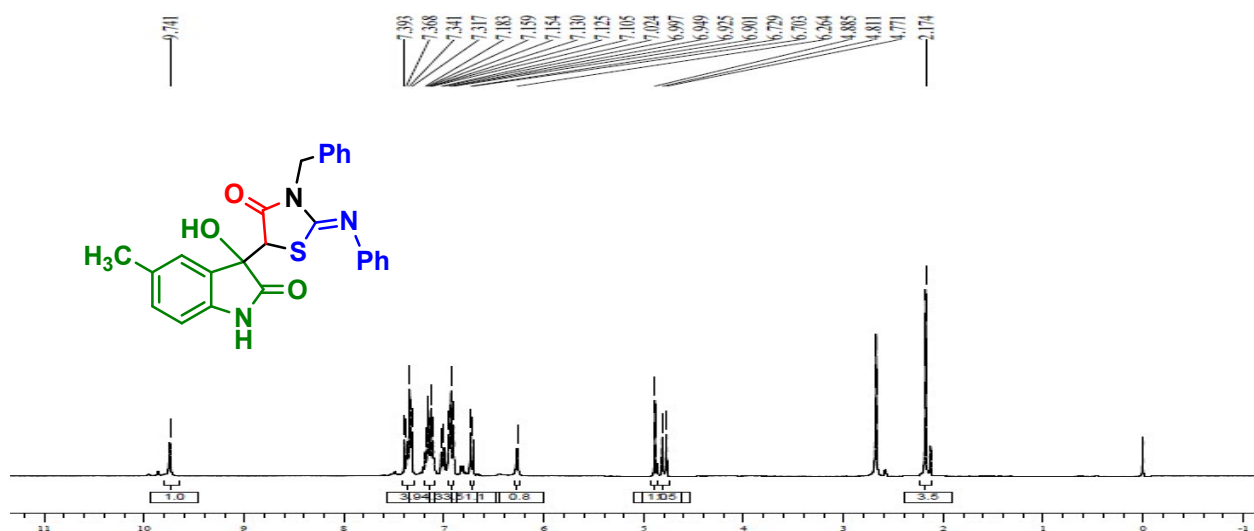

**<sup>13</sup>C NMR (75 MHz, CDCl<sub>3</sub>)**

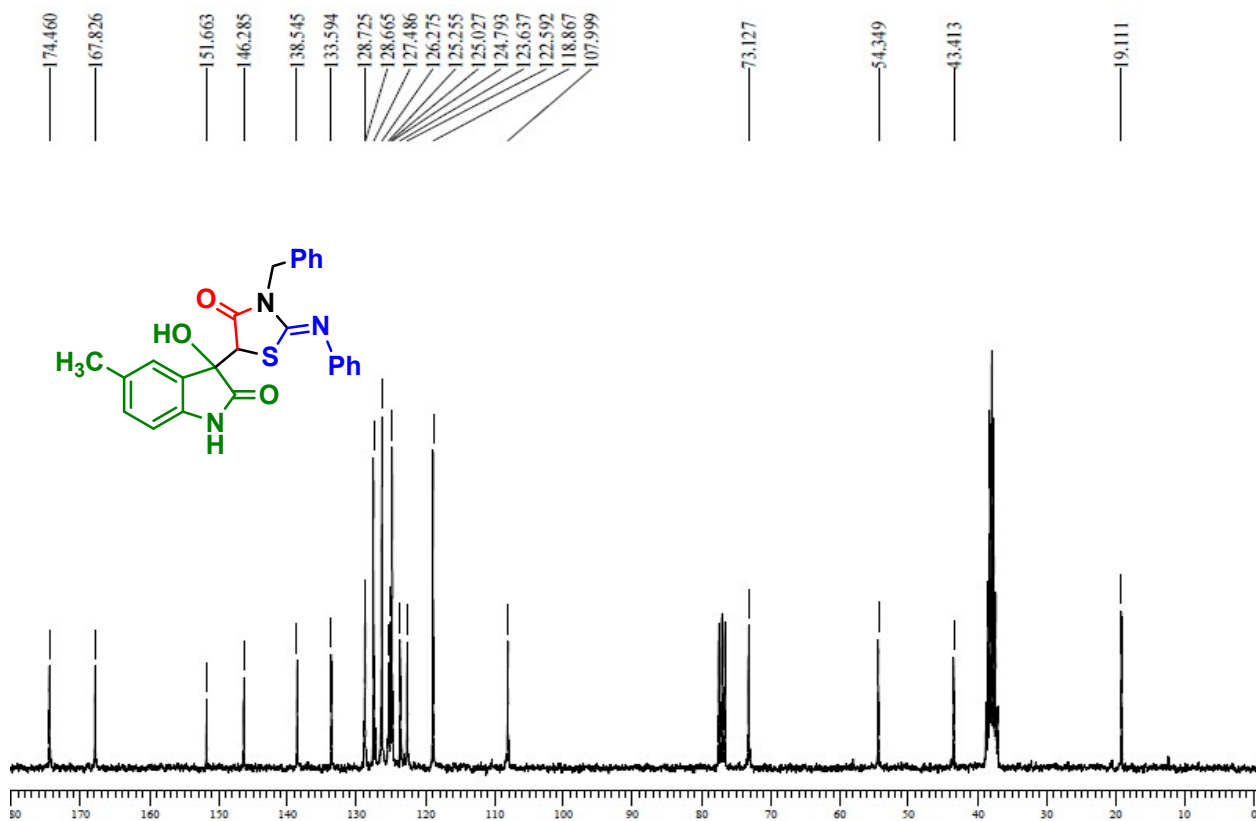

**Compound 5m**



**<sup>1</sup>H NMR (300 MHz, CDCl<sub>3</sub>)**

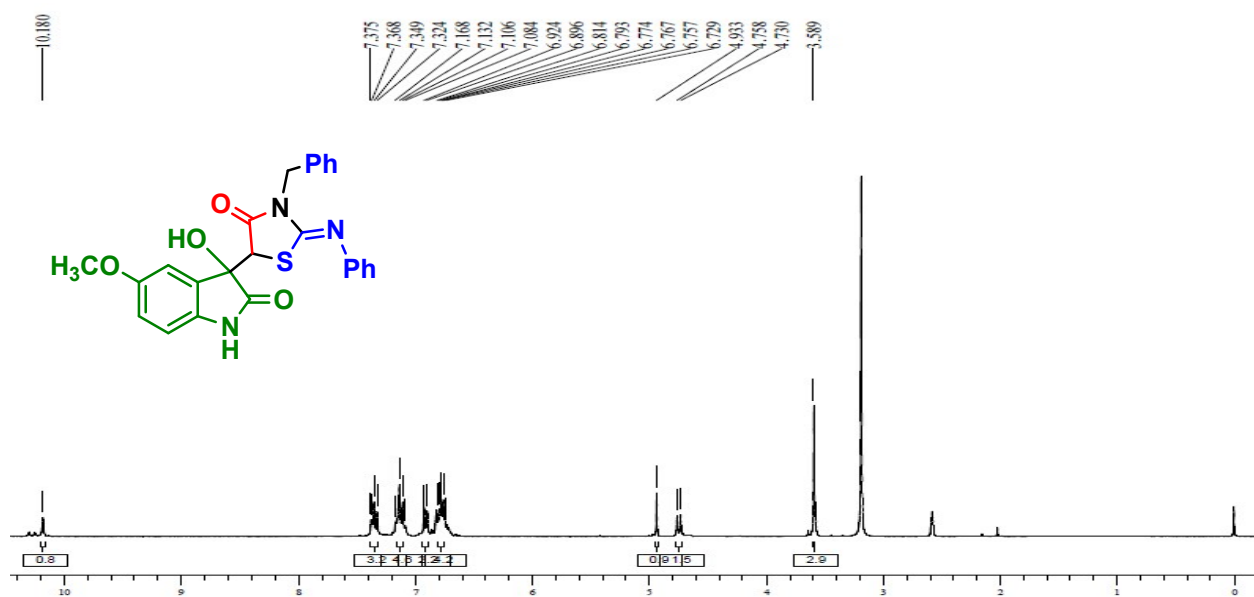

**<sup>13</sup>C NMR (75 MHz, CDCl<sub>3</sub>)**

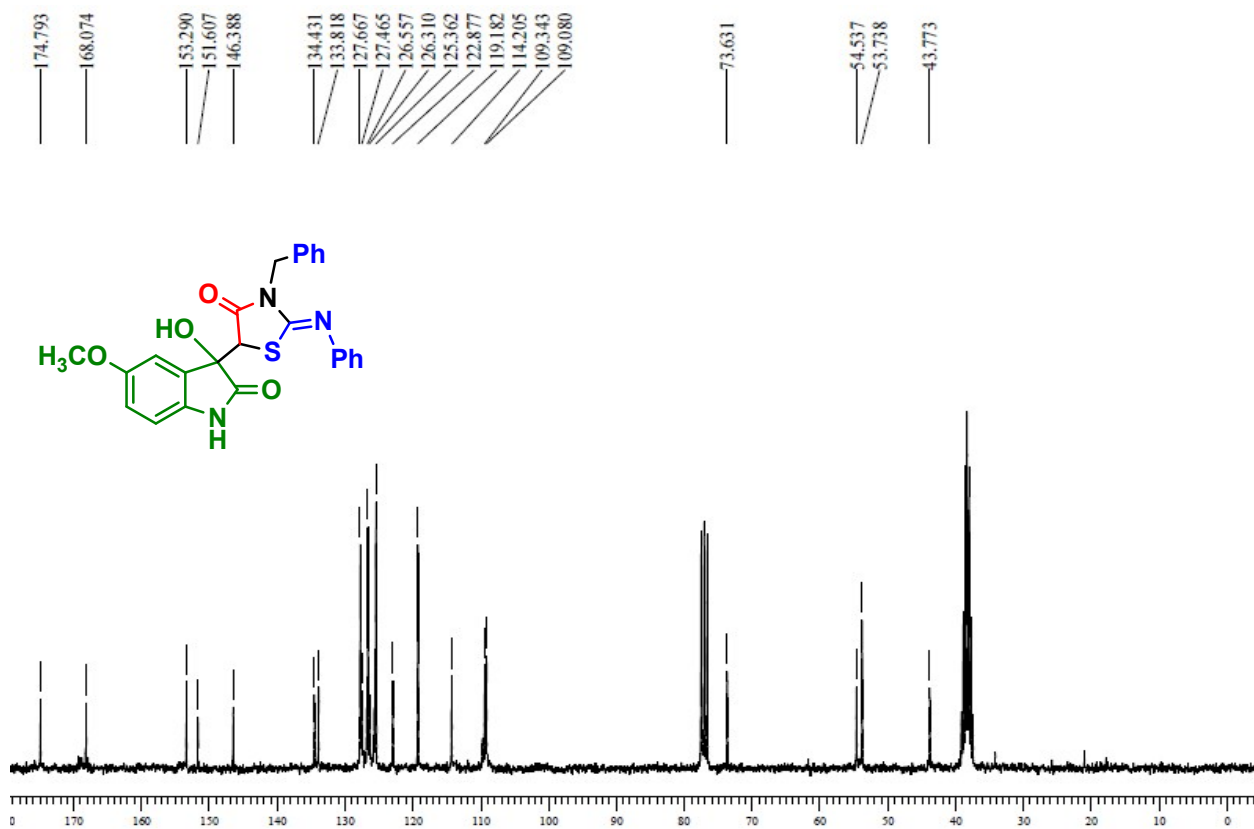

**Compound 5n**

**$^1\text{H}$  NMR (300 MHz,  $\text{CDCl}_3$ )**

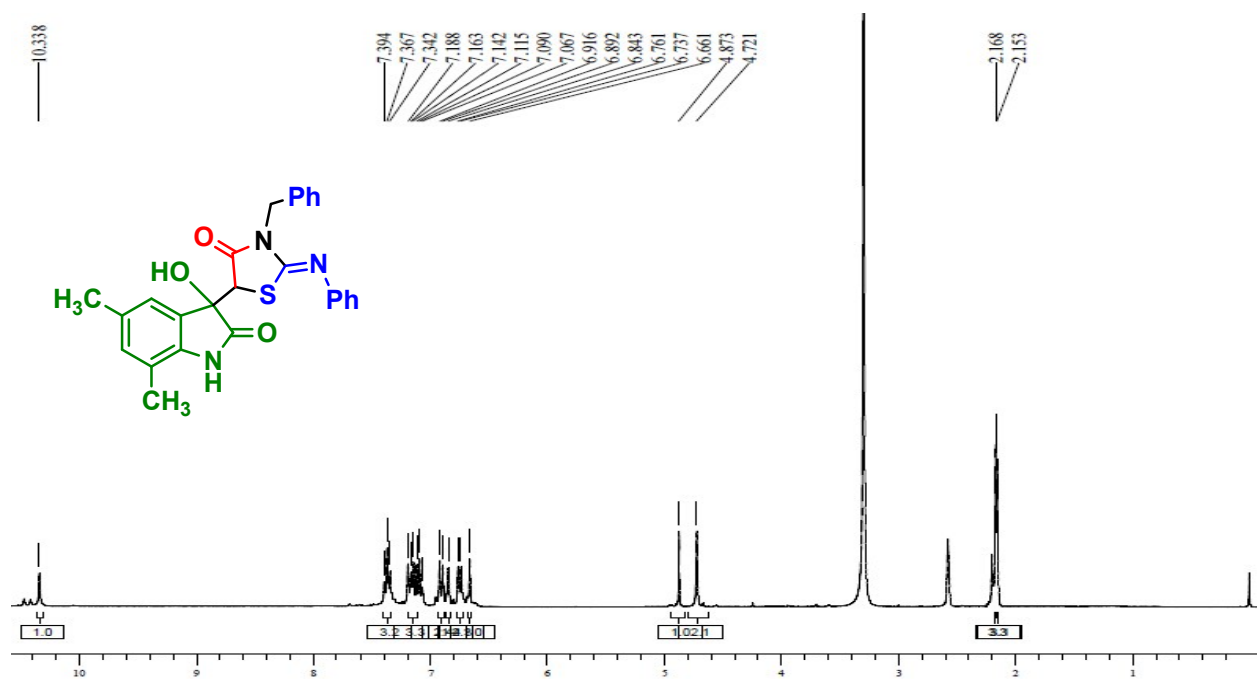

**$^{13}\text{C}$  NMR (75 MHz,  $\text{CDCl}_3$ )**

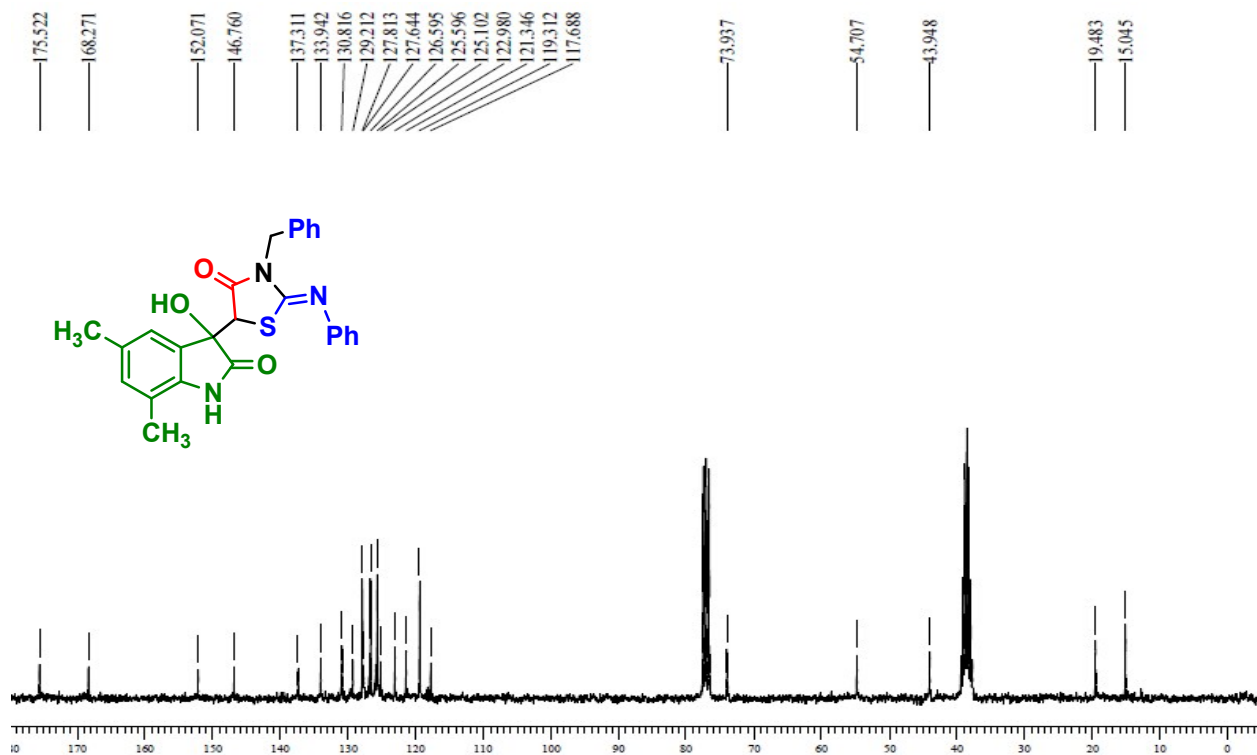

**Compound 5o**

**$^1\text{H}$  NMR (300 MHz,  $\text{CDCl}_3$ )**

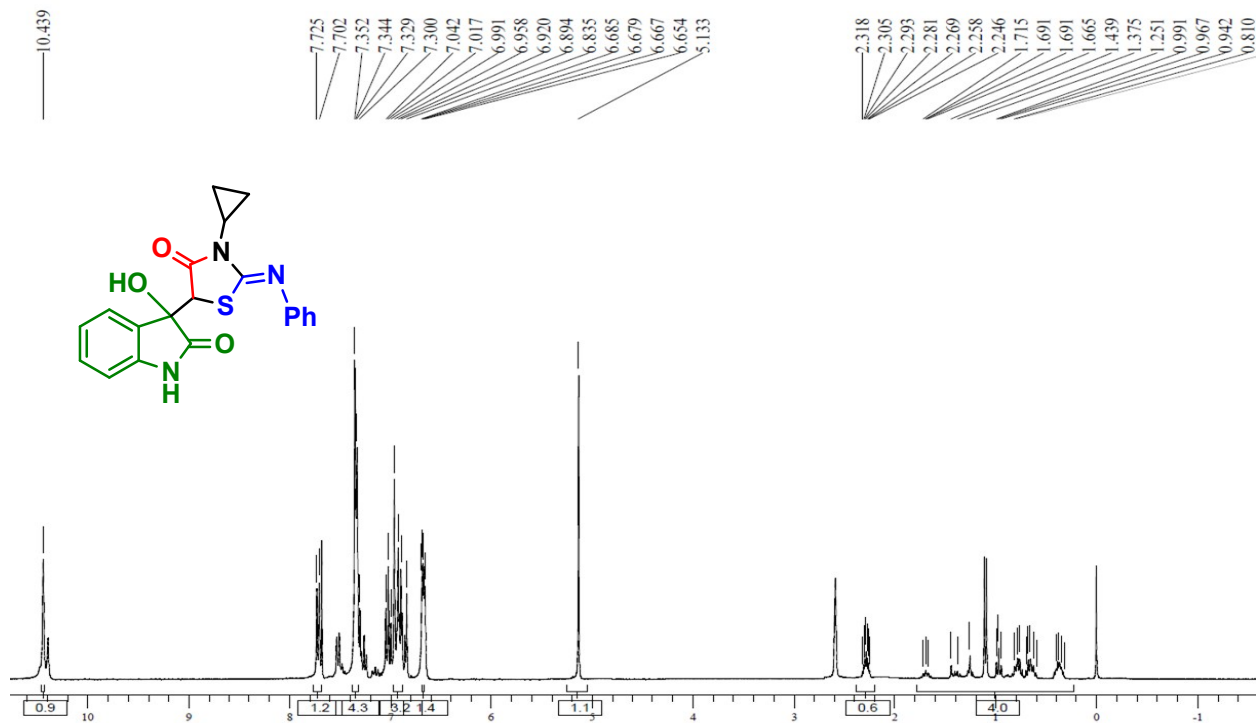

**$^{13}\text{C}$  NMR (75 MHz,  $\text{CDCl}_3$ )**

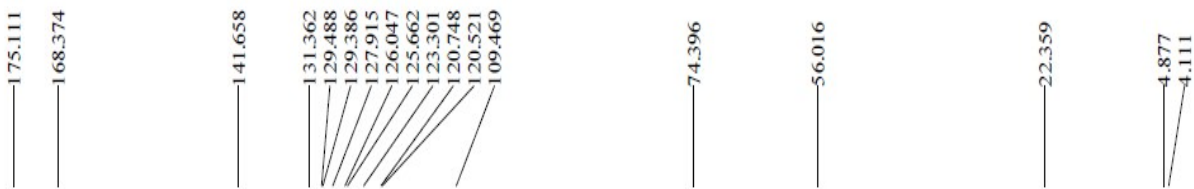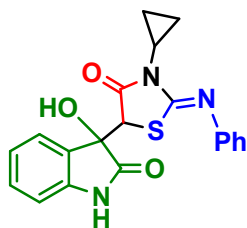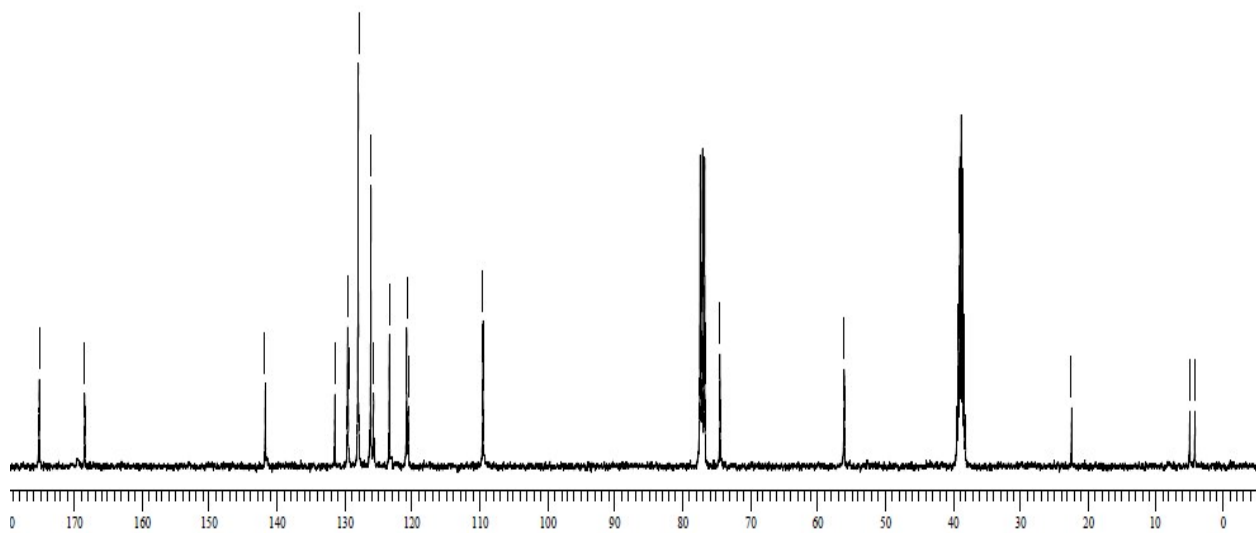

**Compound 5p**

### $^1\text{H}$ NMR (300 MHz, $\text{CDCl}_3$ )

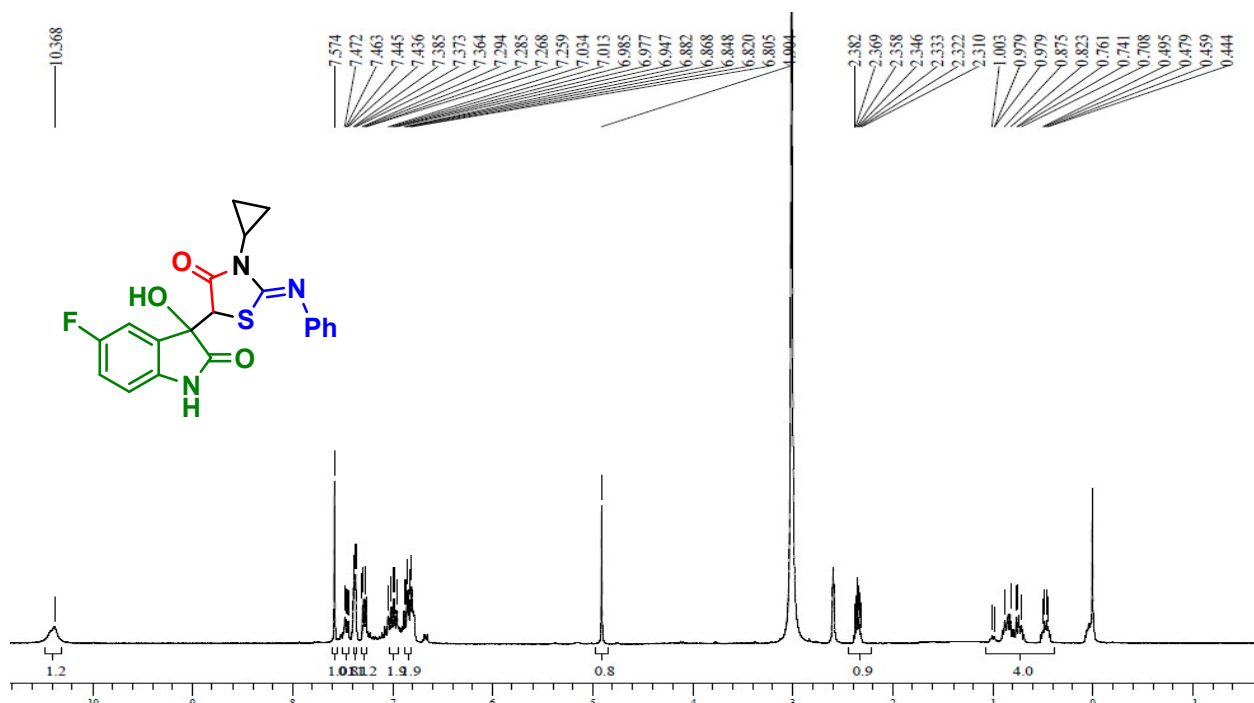

### $^{13}\text{C}$ NMR (75 MHz, $\text{CDCl}_3$ )

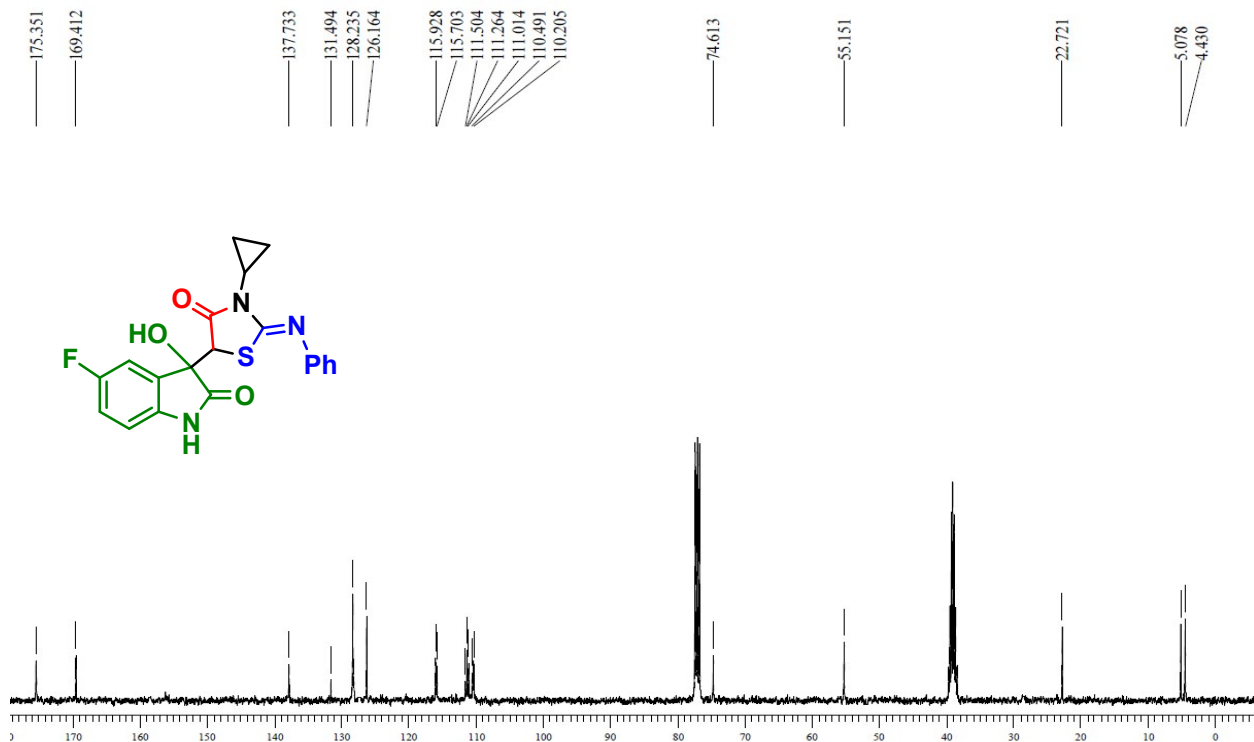

**Compound 5q**

### $^1\text{H}$ NMR (300 MHz, $\text{CDCl}_3$ )

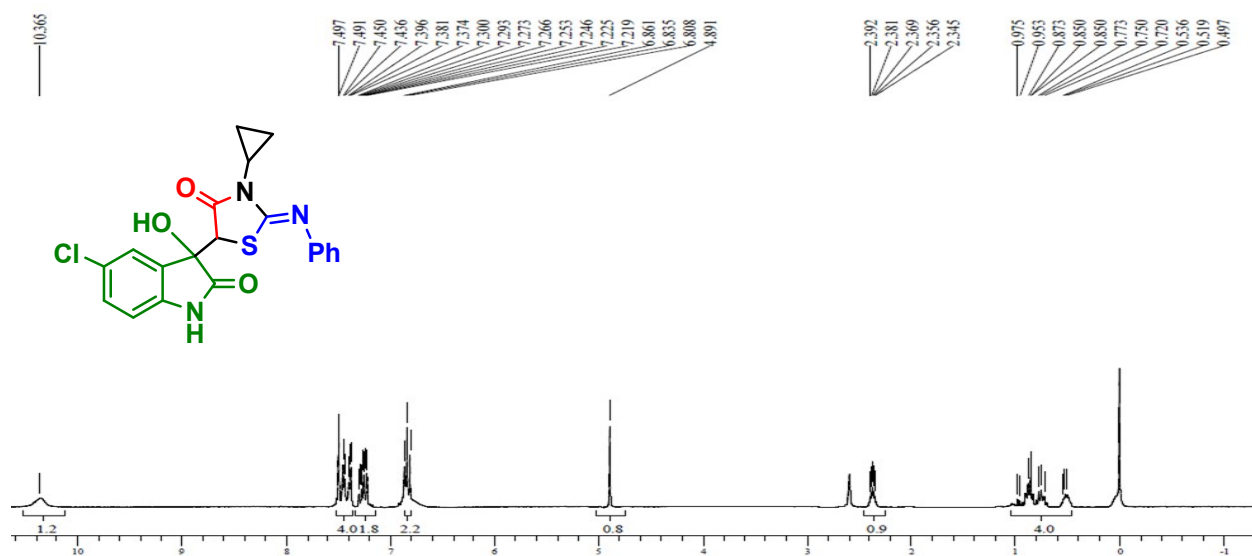

### $^{13}\text{C}$ NMR (75 MHz, $\text{CDCl}_3$ )

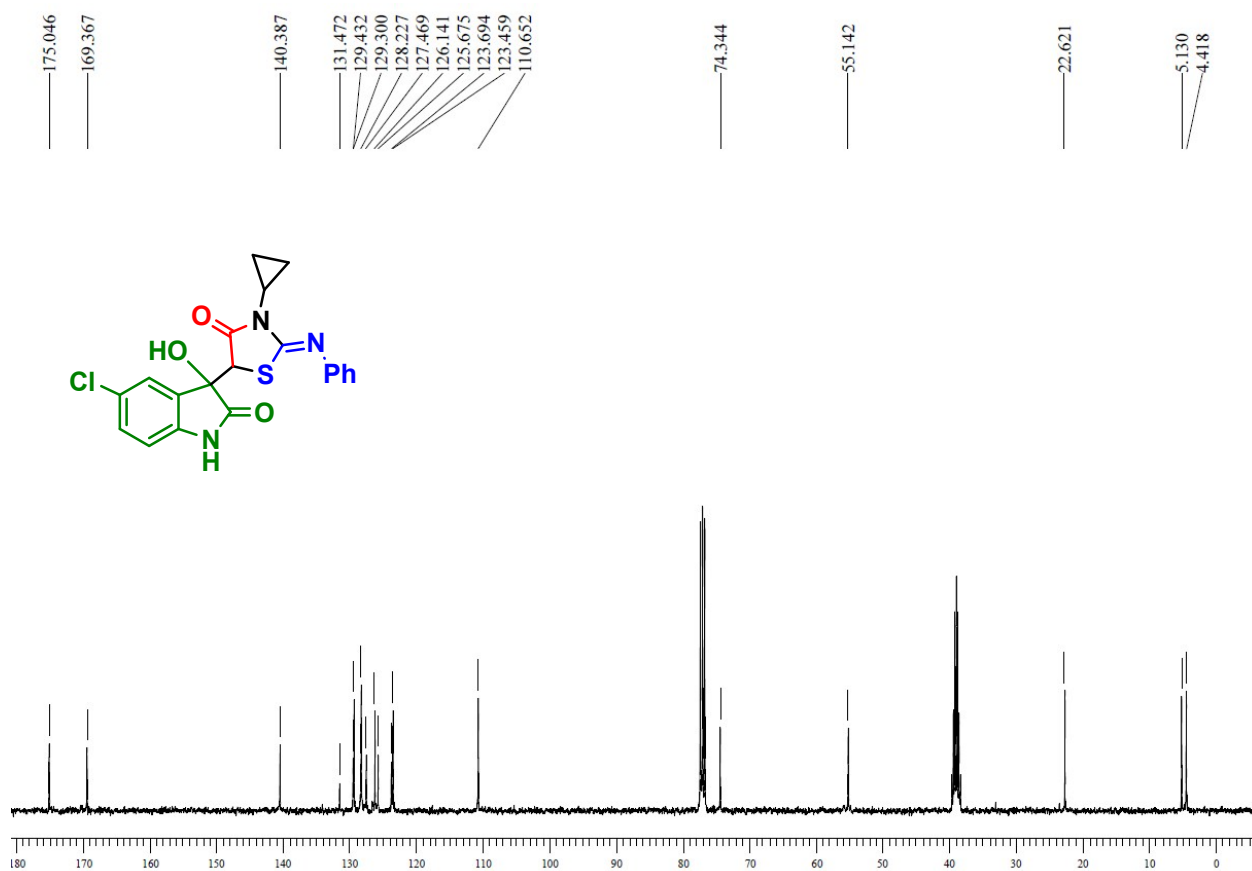

**Compound 5r**

**<sup>1</sup>H NMR (300 MHz, CDCl<sub>3</sub>)**

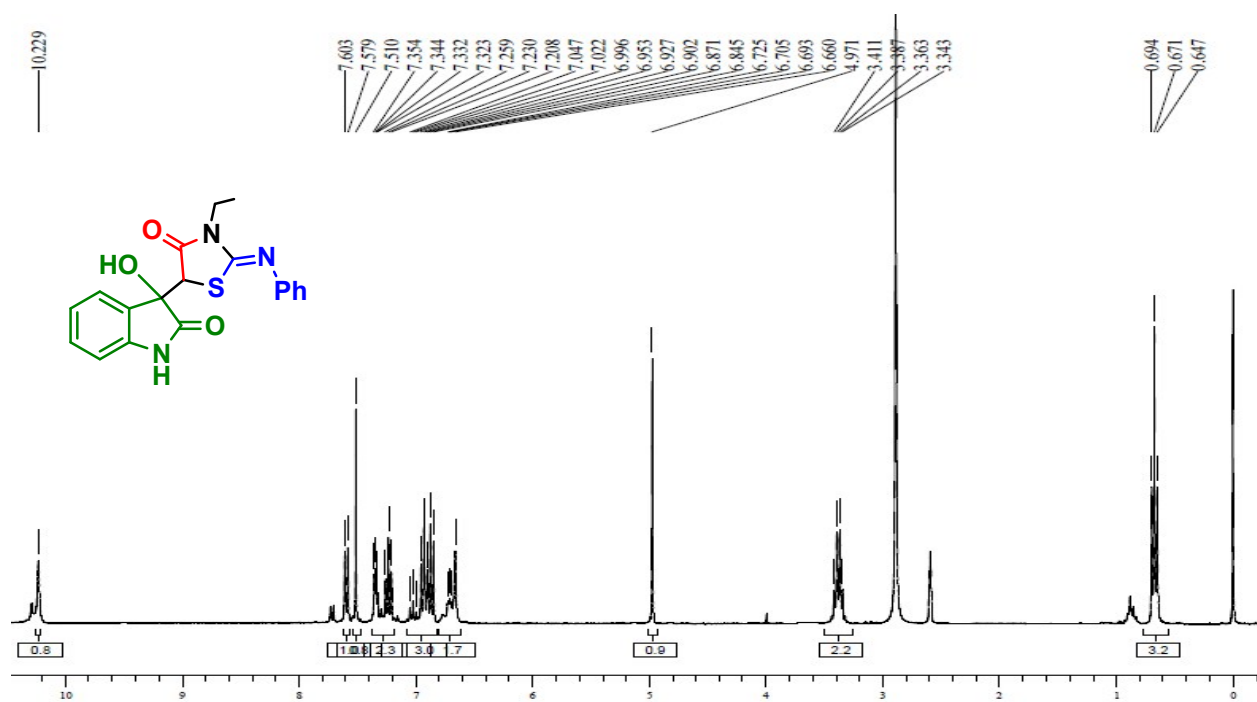

**<sup>13</sup>C NMR (75 MHz, CDCl<sub>3</sub>)**

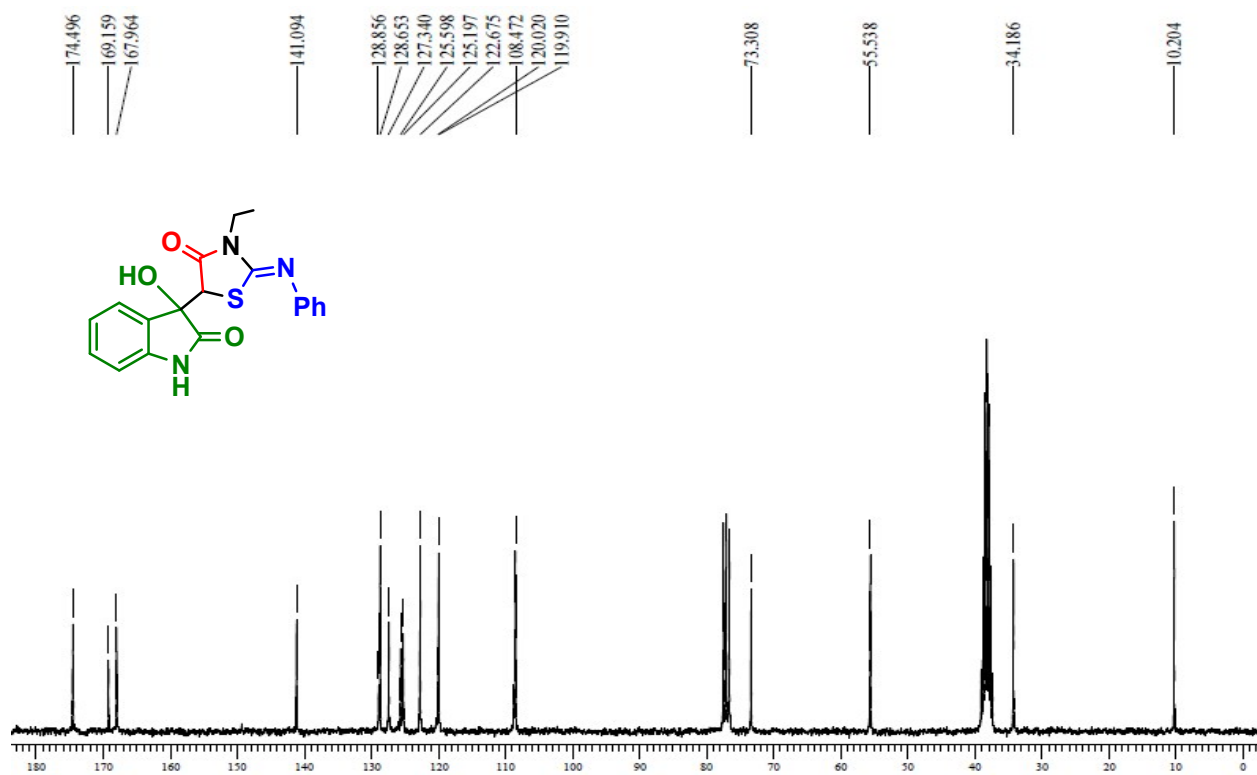

**Compound 5s**

**$^1\text{H}$  NMR (300 MHz,  $\text{CDCl}_3$ )**

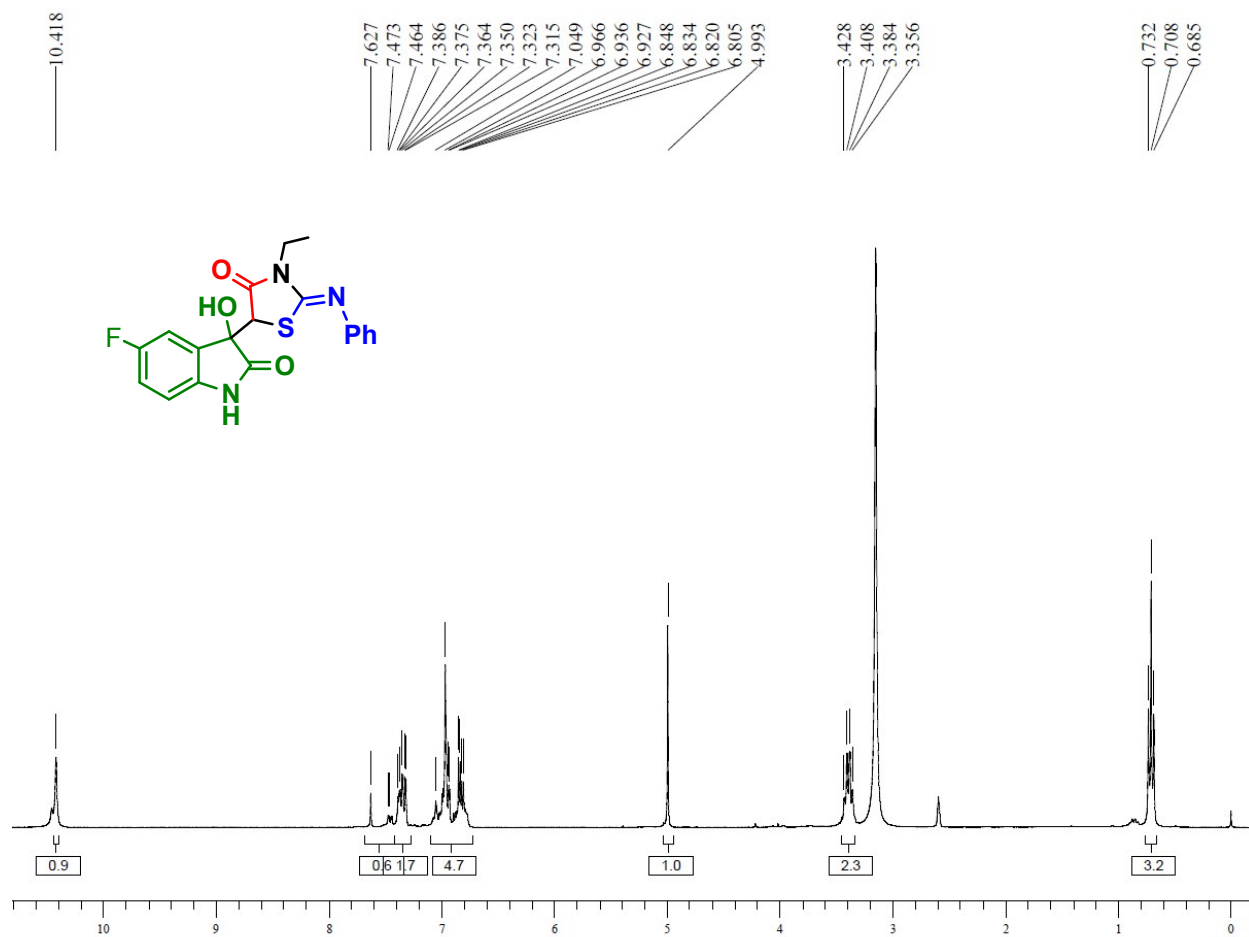

**$^{13}\text{C}$  NMR (75 MHz,  $\text{CDCl}_3$ )**



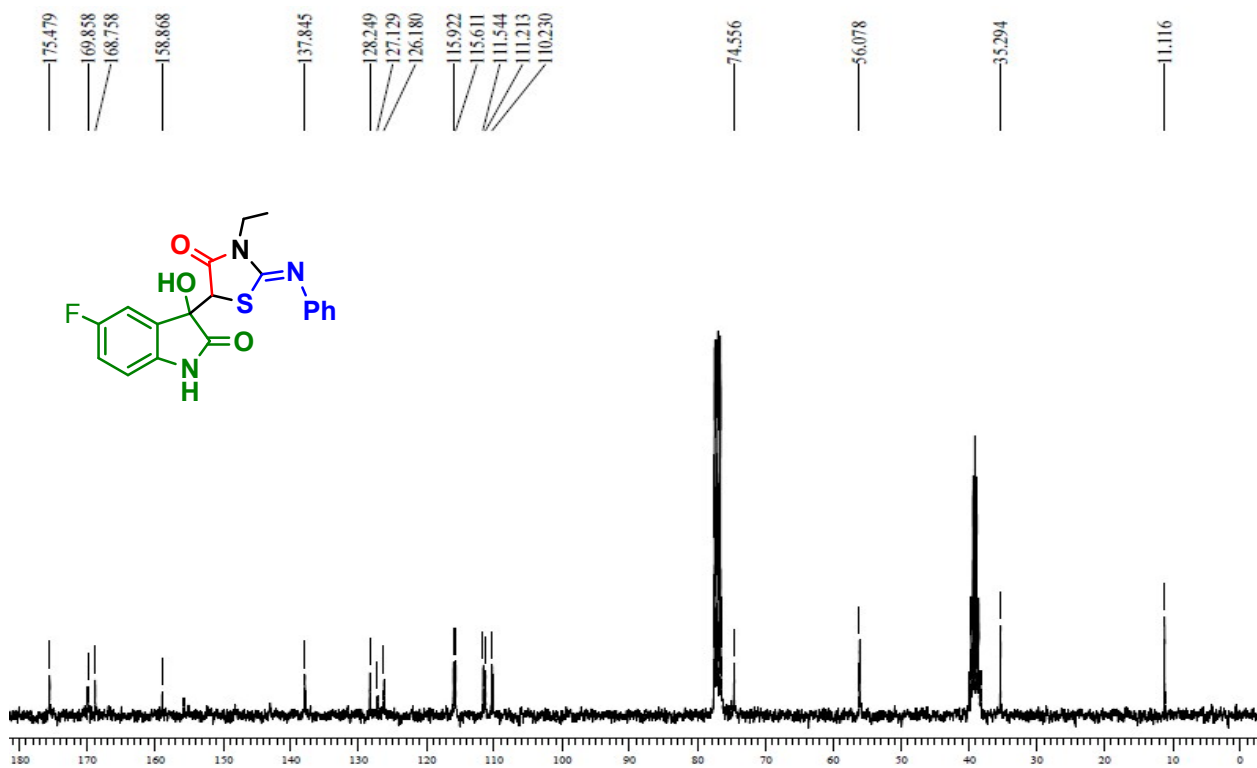

**Compound 5t**

**<sup>1</sup>H NMR (300 MHz, CDCl<sub>3</sub>)**

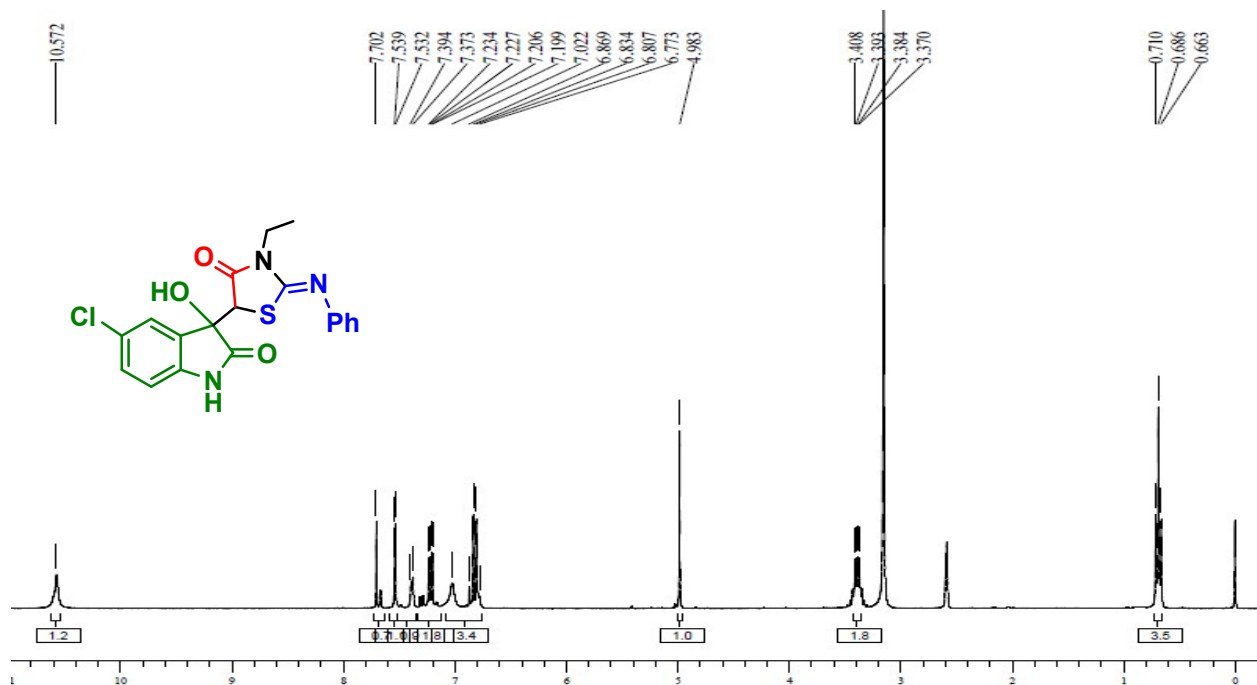

**<sup>13</sup>C NMR (75 MHz, CDCl<sub>3</sub>)**

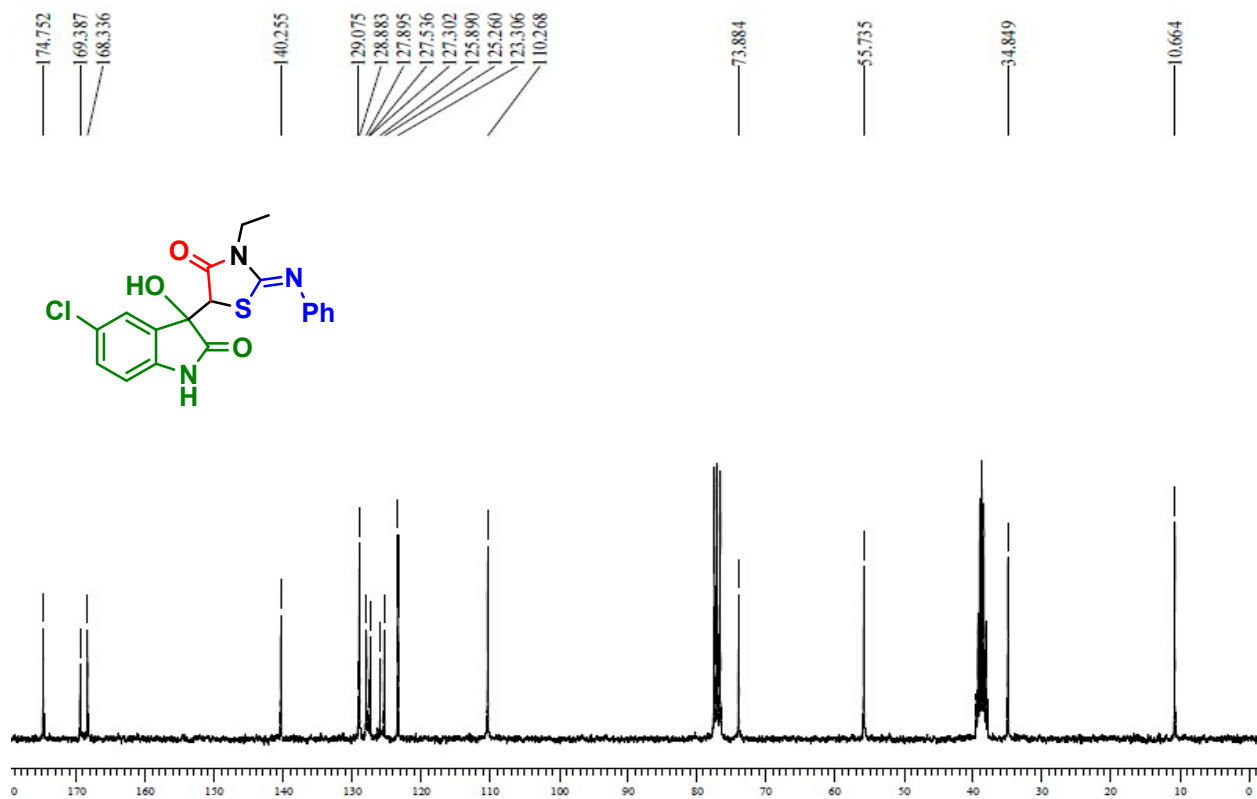

**Compound 5u**

**<sup>1</sup>H NMR (300 MHz, CDCl<sub>3</sub>)**

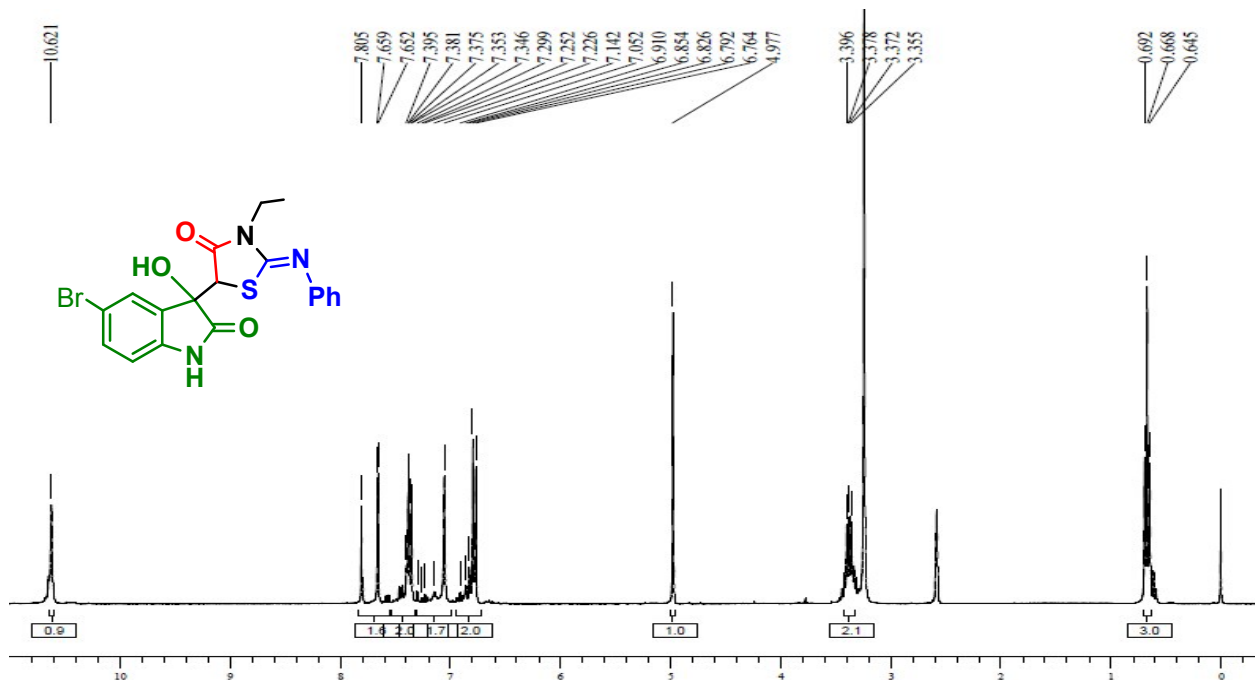

**<sup>13</sup>C NMR (75 MHz, CDCl<sub>3</sub>)**

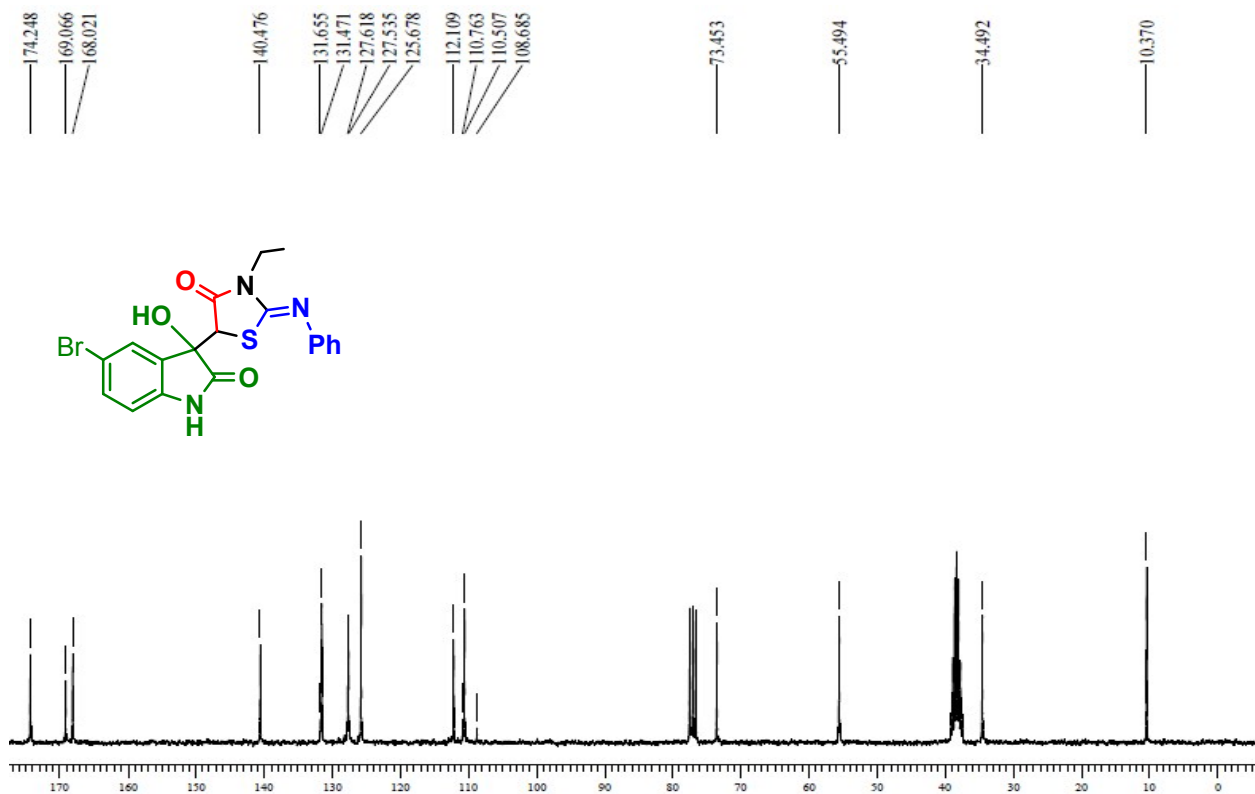

**Compound 5v**

**<sup>1</sup>H NMR (300 MHz, CDCl<sub>3</sub>)**

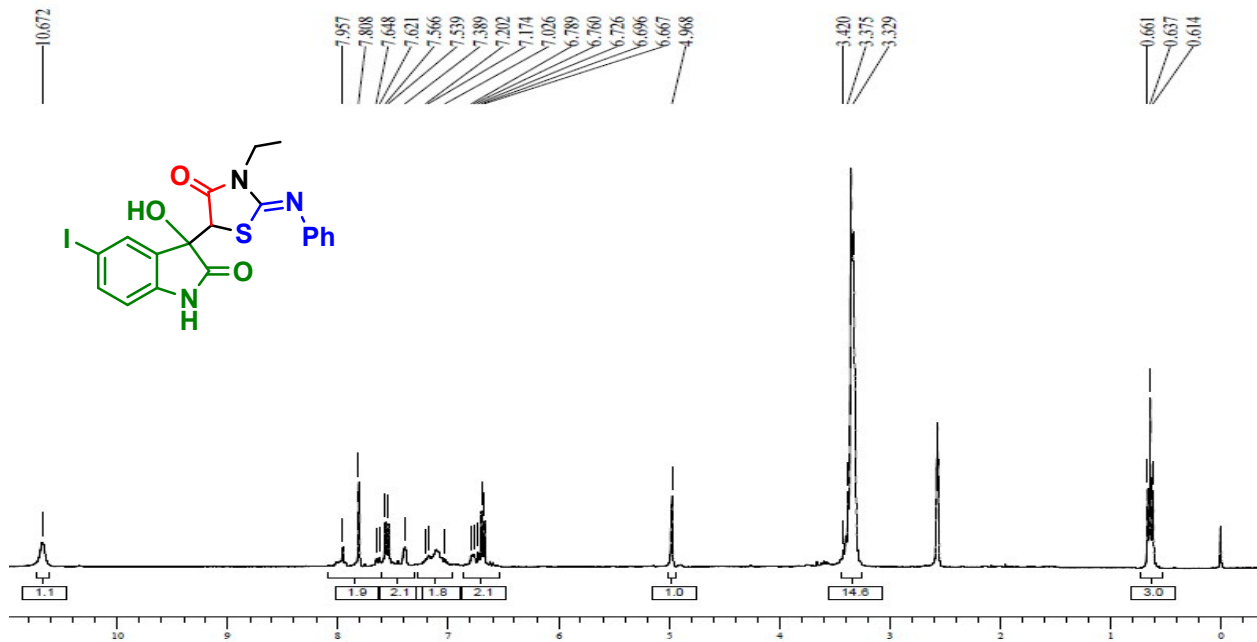

**<sup>13</sup>C NMR (75 MHz, CDCl<sub>3</sub>)**

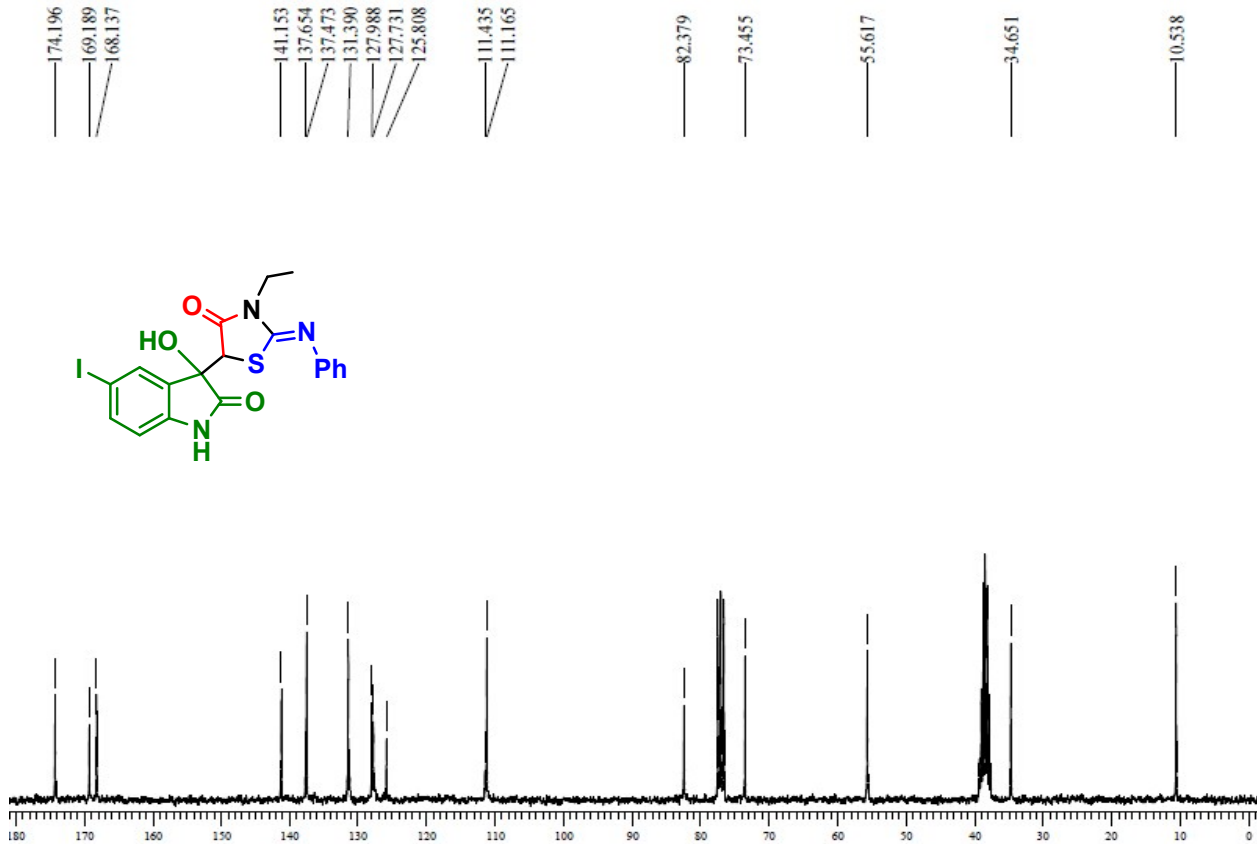

**Compound 5w**

**<sup>1</sup>H NMR (300 MHz, CDCl<sub>3</sub>)**

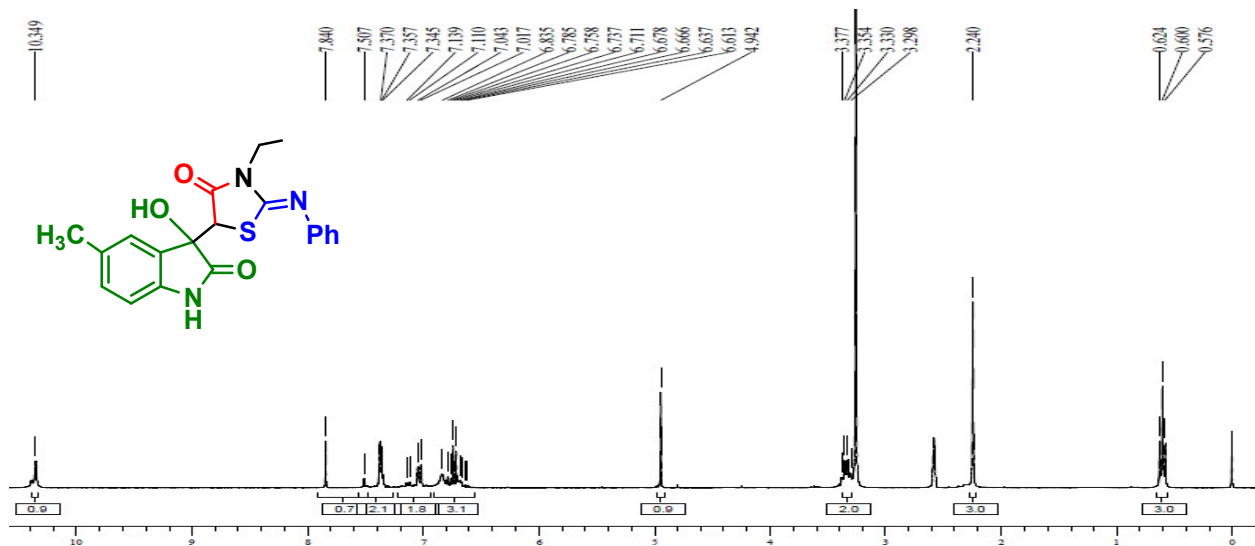

**<sup>13</sup>C NMR (75 MHz, CDCl<sub>3</sub>)**

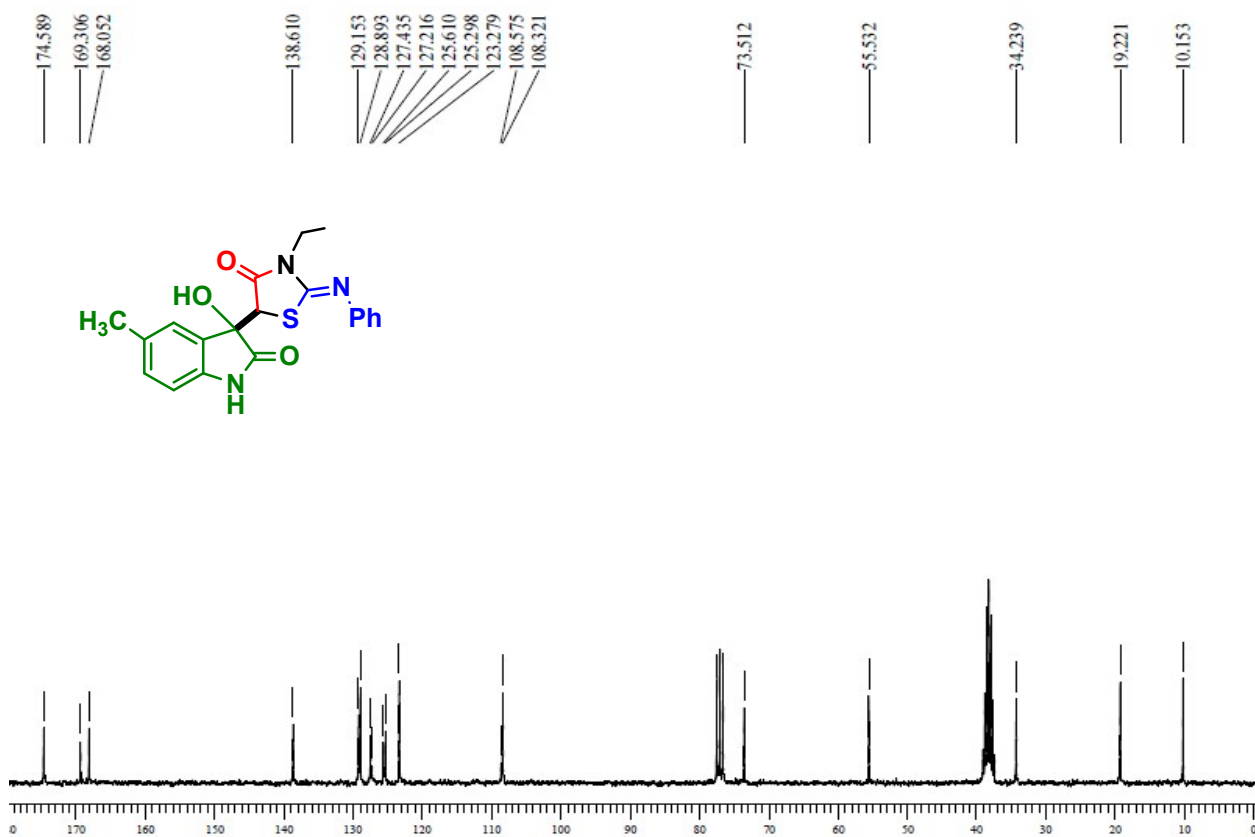

**Compound 5x**

**<sup>1</sup>H NMR (300 MHz, CDCl<sub>3</sub>)**

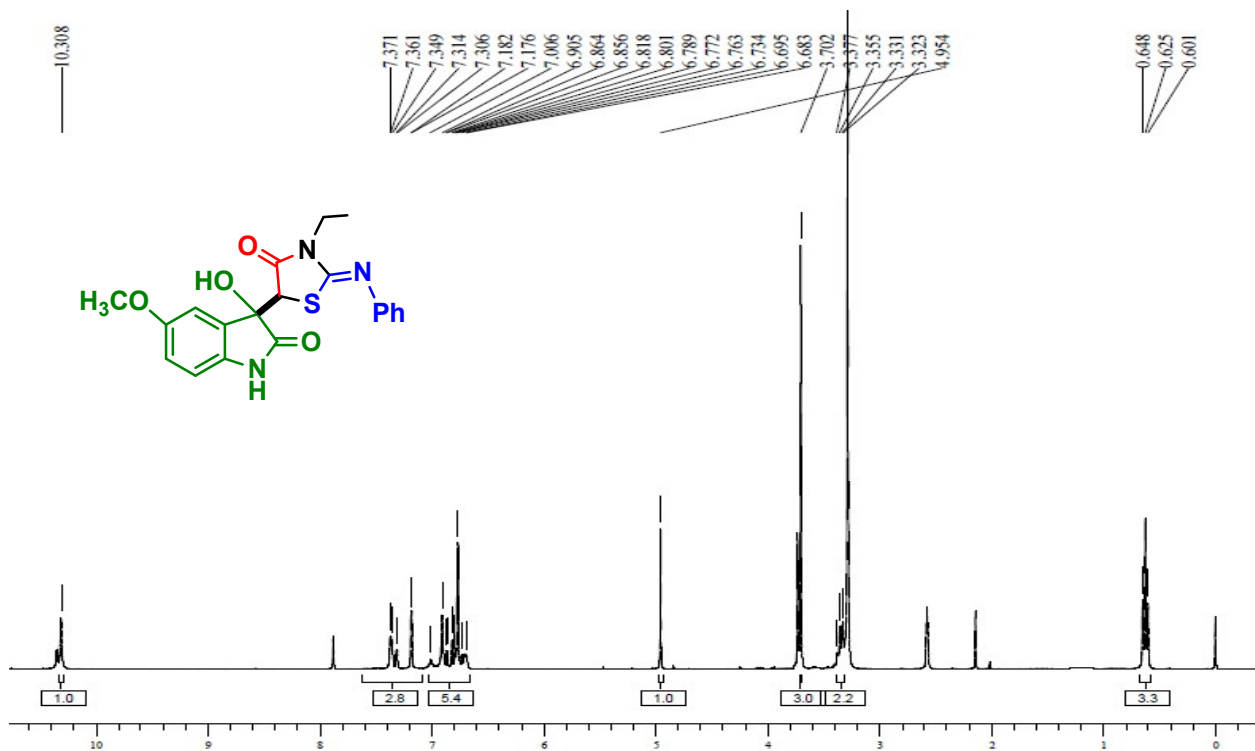

**<sup>13</sup>C NMR (75 MHz, CDCl<sub>3</sub>)**

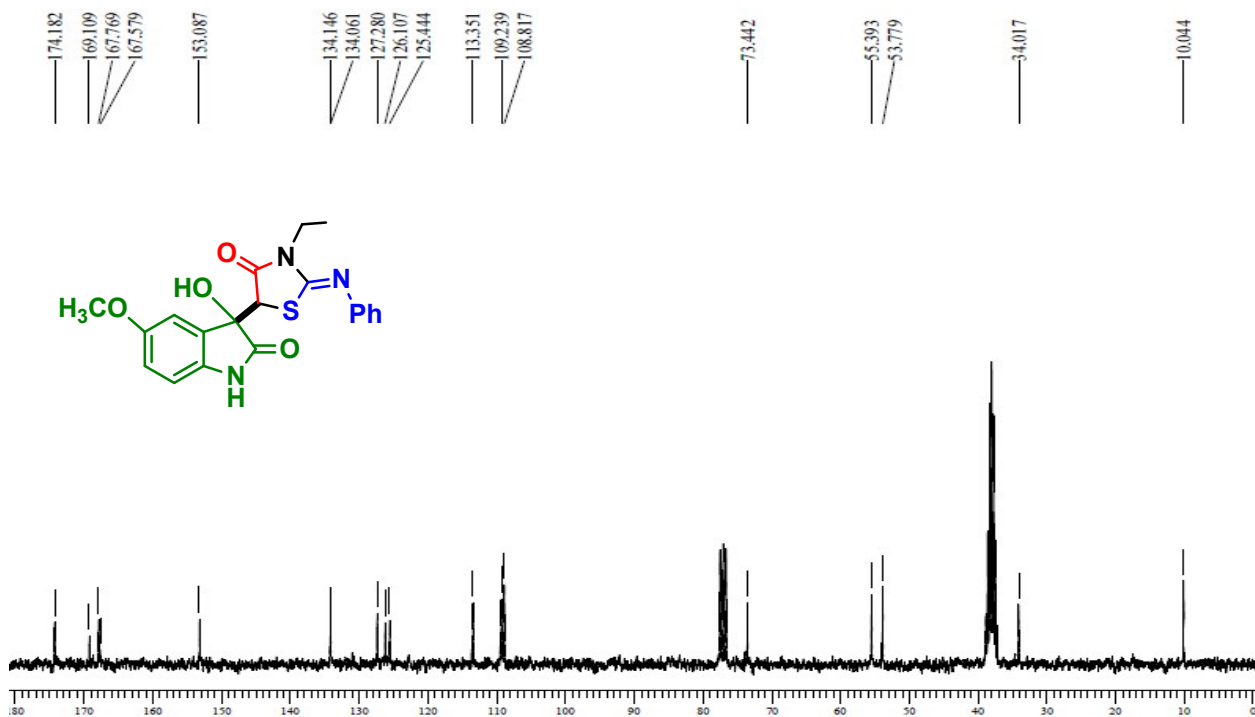

Supplement: c5ra24127h1.pdf [file c5ra24127h1.pdf]
